# Supplementary material
Source: PubMed Central journal article supplement (PMC7114723)
Supplement: ily026_suppl-table-2_revision_er_06-06-2019.pdf [file ily026_suppl-table-2_revision_er_06-06-2019.pdf]

**Supplementary Table 2:** spontaneous mouse mutations resulting in experimentally relevant immune phenotypes.

| Gene/Locus symbol | Gene/Locus name                                    | Chr | Function                                                                                                                                                                                                                                                                                             | Mutation or allelic variant symbol | Mutation or allelic variant name | Mutation or allelic variant detail                                                                                                                                                                  | Original/affected strain/stock                  | Phenotype                                                                                                                                                                                                                                                                                                                                                                                                                                                                                                                                                                                                                                                                                                                                                                                                                                                                                                                                                                                                                                                                                                                    | Human disease models                                                                              |
|-------------------|----------------------------------------------------|-----|------------------------------------------------------------------------------------------------------------------------------------------------------------------------------------------------------------------------------------------------------------------------------------------------------|------------------------------------|----------------------------------|-----------------------------------------------------------------------------------------------------------------------------------------------------------------------------------------------------|-------------------------------------------------|------------------------------------------------------------------------------------------------------------------------------------------------------------------------------------------------------------------------------------------------------------------------------------------------------------------------------------------------------------------------------------------------------------------------------------------------------------------------------------------------------------------------------------------------------------------------------------------------------------------------------------------------------------------------------------------------------------------------------------------------------------------------------------------------------------------------------------------------------------------------------------------------------------------------------------------------------------------------------------------------------------------------------------------------------------------------------------------------------------------------------|---------------------------------------------------------------------------------------------------|
| <i>Btk</i>        | Bruton agammaglobulinemia tyrosine kinase          | X   | tyrosine-protein kinase; B cell development, differentiation, and activation; BCR signal transduction; regulation of TLRs signaling in B cells; high-affinity IgE receptor signal transduction on mast cell; regulation of neutrophilic granulocyte maturation and function.                         | <i>Btk<sup>sd</sup></i>            | X-linked immune deficiency       | single point mutation; C-to-T transition; arginine to cysteine substitution at position 28; LOF; X-linked recessive inheritance.                                                                    | CBA/HN                                          | <b>Immune:</b> homozygous females and hemizygous males; defective B cell development, differentiation, and activation (including T-independent B lymphocytes); profound B-1 cell deficiency; impaired IgM and IgG production in response to thymus-independent TI-2 antigens (impaired T-independent B cell response); impaired granulocyte maturation and function; abnormal regulation of TLRs signaling; defective mast cells degranulation and proinflammatory cytokines production upon high-affinity IgE receptor engagement; severe hypogammaglobulinemia (especially IgM and IgG3). <sup>1-5</sup><br><br><b>Other:</b> N/A.                                                                                                                                                                                                                                                                                                                                                                                                                                                                                         | Bruton-type agammaglobulinemia; X-linked immunodeficiency                                         |
| <i>Cacnb4</i>     | calcium channel, voltage-dependent, beta 4 subunit | 2   | cytoplasmic $\beta$ subunit of voltage-dependent calcium channels; important role in calcium channel function by modulating G protein inhibition, increasing peak calcium current, controlling the $\alpha_1$ membrane pore subunit, and shifting the voltage dependence of activation/inactivation. | <i>Cacnb4<sup>lh</sup></i>         | lethargic                        | insertion mutation; 4 bp; splice donor site; exon skipping; translational frameshift; protein truncation with loss of the $\alpha_1$ subunit binding site; LOF; hypomorphic; recessive inheritance. | BALB/cGn                                        | <b>Immune:</b> immunodeficiency possibly resulting from a stress response; early thymic involution at 3 to 4 weeks; reduced lymphoid organs size; severe leukocytopenia and anemia; defective cell-mediated immune functions; increased levels of serum IgG1. <sup>6-9</sup><br><br><b>Other:</b> early lethality (approx. 50 days of age); ataxia and lethargy followed by seizures; absence epilepsy (petit mal seizures); no evidence of pathological changes in the CNS or skeletal muscles; dyskinetic motor behavior; pituitary-adrenal hypercorticism. <sup>9-11</sup>                                                                                                                                                                                                                                                                                                                                                                                                                                                                                                                                                | idiopathic generalized epilepsy (IGE); juvenile myoclonic epilepsy (JME); episodic ataxia, type 5 |
| <i>Csf1</i>       | colony stimulating factor 1                        | 3   | cytokine; differentiation/maturation and activation of monocytes and M $\phi$ s; maintenance of bone marrow progenitor cells; innate immunity; inflammation.                                                                                                                                         | <i>Csf1<sup>op</sup></i>           | osteopetrosis                    | insertion mutation; single nucleotide (T); 262 bp downstream from the initiation codon; frameshift with premature stop codon; LOF; recessive inheritance.                                           | B6;DW- <i>Pou1f1<sup>dw</sup></i>               | <b>Immune:</b> perturbed bone marrow microenvironment with defective hematopoiesis; impaired differentiation and survival of cells of the mononuclear phagocyte system; impaired B lymphopoiesis; generalized deficiency in normal tissue-resident M $\phi$ s including osteoclasts, microglia and Kupffer's cells; attenuated tumorigenesis due to defects in development of pro-tumorigenic M2 polarized TAMs. <sup>9,12-15</sup><br><br><b>Other:</b> high rate of lethality around weaning; severe growth retardation; osteopetrosis resulting in abnormal skeletal development; craniofacial deformities (shortened snout and domed skull); unerupted incisors; shortened extremities; optic nerve compression; hearing impairment due to abnormal ossicle formation and reduced tympanic bullae volume; obliteration of bone marrow cavity; dysfunctional satellite cells in skeletal muscles; reduced fertility in females; defective mammary gland development and lactation; no phenotype rescue following transplant of normal bone marrow cells (not intrinsic defect of hematopoietic cells). <sup>9,16-18</sup> | osteopetrosis                                                                                     |
| <i>Dock2</i>      | dedicator of cytokinesis 2                         | 11  | guanine nucleotide exchange factor; regulation of Rac signaling; chemotaxis; leukocyte response to chemokines; cytoskeletal rearrangements; lymphocyte migration; plasmacytoid DC homing and function.                                                                                               | <i>Dock2<sup>miHsd</sup></i>       | mutation 1, Harlan               | duplication and nucleotides substitution; duplication of exons 28 and 29; frameshift mutation after exon 29 with premature stop codon; LOF; hypomorphic; recessive inheritance.                     | C57BL/6NHsd (from specific breeding facilities) | <b>Immune:</b> (compared to other C57BL/6 substrains including C57BL/6NClr, C57BL/6NJ or C57BL/6NTac) increased numbers of CD8+ T cells; decreased follicular B cell number; impaired development of splenic marginal zone B cells; abnormal activation of B cells; defective development and function of plasmacytoid DC. <sup>19,20</sup><br><br><b>Other:</b> hearing impairment; cochlear degeneration. <sup>21</sup>                                                                                                                                                                                                                                                                                                                                                                                                                                                                                                                                                                                                                                                                                                    | immunodeficiency 40                                                                               |
| <i>Eef1a2</i>     | eukaryotic translation elongation factor 1 alpha 2 | 2   | $\alpha$ subunit of the elongation factor-1 complex; tissue specific (e.g. neurons, cardiac and skeletal muscle); enzymatic delivery of aminoacyl tRNAs to the ribosome.                                                                                                                             | <i>Eef1a2<sup>nst</sup></i>        | wasted                           | intragenic deletion; promoter and first exon of the gene; LOF; recessive inheritance.                                                                                                               | HRS/J                                           | <b>Immune:</b> immunodeficiency likely resulting from a stress response; marked lymphoid atrophy/depletion in the spleen, thymus, and lymph nodes; leukopenia; defects in mucosal immunity resulting from reduced number of IgA plasma cells in the entire large and small intestine; decreased number of DP thymocytes; increased sensitivity of T cells to ionizing                                                                                                                                                                                                                                                                                                                                                                                                                                                                                                                                                                                                                                                                                                                                                        | ataxia telangiectasia                                                                             |

| Gene/Locus symbol | Gene/Locus name                                      | Chr | Function                                                                                                                                                                                                                               | Mutation or allelic variant symbol                        | Mutation or allelic variant name                                                                                            | Mutation or allelic variant detail                                                                                                                                                                                                                                                                                                                                                                                                                                      | Original/affected strain/stock                                                     | Phenotype                                                                                                                                                                                                                                                                                                                                                                                                                                                                                                                                                                                                                                                                                                                                                                                                                                                                       | Human disease models                                                                      |
|-------------------|------------------------------------------------------|-----|----------------------------------------------------------------------------------------------------------------------------------------------------------------------------------------------------------------------------------------|-----------------------------------------------------------|-----------------------------------------------------------------------------------------------------------------------------|-------------------------------------------------------------------------------------------------------------------------------------------------------------------------------------------------------------------------------------------------------------------------------------------------------------------------------------------------------------------------------------------------------------------------------------------------------------------------|------------------------------------------------------------------------------------|---------------------------------------------------------------------------------------------------------------------------------------------------------------------------------------------------------------------------------------------------------------------------------------------------------------------------------------------------------------------------------------------------------------------------------------------------------------------------------------------------------------------------------------------------------------------------------------------------------------------------------------------------------------------------------------------------------------------------------------------------------------------------------------------------------------------------------------------------------------------------------|-------------------------------------------------------------------------------------------|
|                   |                                                      |     |                                                                                                                                                                                                                                        |                                                           |                                                                                                                             |                                                                                                                                                                                                                                                                                                                                                                                                                                                                         |                                                                                    | radiation; cytokine imbalance (decreased IL5 and increased IL1, IL2, IFN $\gamma$ , and TGF $\beta$ 1); <sup>9,22,23</sup><br><br><u>Other:</u> early lethality (approx. 30 days of age); tremors and ataxia at weaning; progressive motor neuron degeneration and loss accompanied by gliosis, generalized muscle wasting and paralysis; <sup>9,23,24</sup>                                                                                                                                                                                                                                                                                                                                                                                                                                                                                                                    |                                                                                           |
| <i>Fas</i>        | TNF receptor superfamily member 6                    | 19  | death receptor ; extrinsic apoptotic pathway; peripheral tolerance; AICD; cytotoxic T cell and NK cell-mediated apoptosis.                                                                                                             | <i>Fas</i> <sup>lpr</sup><br><i>Fas</i> <sup>lpr-cg</sup> | <i>Fas</i> <sup>lpr</sup> ; lymphoproliferation<br><br><i>Fas</i> <sup>lpr-cg</sup> ; lymphoproliferation complementing gld | <i>Fas</i> <sup>lpr</sup> ; transposon insertion; ETn; intron 2; premature termination of transcription; aberrant mRNA splicing; leaky mutation; low levels of full-length transcripts and functional receptor formation; LOF; hypomorphic; recessive inheritance.<br><br><i>Fas</i> <sup>lpr-cg</sup> ; single point mutation; T-to-A transversion; replacement of a highly conserved isoleucine with an asparagine; extracellular domain; LOF; recessive inheritance. | <i>Fas</i> <sup>lpr</sup> ; MRL/MpJ<br><br><i>Fas</i> <sup>lpr-cg</sup> ; CBA/KJms | <u>Immune:</u> generalized autoimmune and lymphoproliferative disorder; thymus (T cell) dependent (neonatal thymectomy associated with phenotype rescue); progressive splenomegaly and lymphadenopathy; secondary lymphoid organs with expansion of DN and B220+ T cells; defective CTL activity; autoimmunity; loss of AICD; unregulated B cell activation in GC; multisystemic infiltrate of activated lymphoid cells; production of autoantibodies including anti-DNA and anti-IgG; immune complex GN; polyarthritis; vasculitis; dysfunctional M1 M $\phi$ -mediated tumor immunity; <i>Fas</i> <sup>lpr-cg</sup> autoimmune phenotype less severe than <i>Fas</i> <sup>lpr</sup> mice. <sup>25-31</sup><br><br><u>Other:</u> defective neuronal branching; impaired regulation of spermatogenesis. <sup>32-34</sup>                                                        | autoimmune lymphoproliferative syndrome; Sjogren's syndrome; systemic lupus erythematosus |
| <i>FasL</i>       | Fas ligand                                           | 1   | death receptor ligand; extrinsic apoptotic pathway; peripheral tolerance; activation-induced cell death; cytotoxic T cell and NK cell-mediated apoptosis.                                                                              | <i>FasL</i> <sup>gld</sup>                                | generalized lymphoproliferative disease                                                                                     | single point mutation; T-to-C transition; replacement of a highly conserved phenylalanine with a leucine; LOF; recessive inheritance.                                                                                                                                                                                                                                                                                                                                   | C3H/HeJ                                                                            | <u>Immune:</u> generalized autoimmune and lymphoproliferative disorder; thymus (T cell) dependent (neonatal thymectomy associated with phenotype rescue); progressive splenomegaly and lymphadenopathy; secondary lymphoid organs with expansion of DN and B220+ T cells; defective CTL activity; autoimmunity; loss of AICD; unregulated B cell activation in GC; multisystemic infiltrate of activated lymphoid cells; production of autoantibodies including anti-DNA and anti-IgG; immune complex GN; polyarthritis; vasculitis. <sup>25-27,35,36</sup><br><br><u>Other:</u> impaired neuronal branching; impaired regulation of spermatogenesis; enhanced intestinal tumorigenesis with reduced neutrophilic influx. <sup>32,34,37</sup>                                                                                                                                   | autoimmune lymphoproliferative syndrome; systemic lupus erythematosus                     |
| <i>Fcer2a</i>     | Fc receptor, IgE, low affinity II, alpha polypeptide | 8   | CD23, low-affinity receptor for IgE, negative regulation of IgE levels, allergy and resistance to parasites.                                                                                                                           | <i>Fcer2a</i> <sup>hie</sup>                              | hyper IgE                                                                                                                   | multiple point mutations; decreased levels of membranous expression; LOF; hypomorphic; dominant inheritance.                                                                                                                                                                                                                                                                                                                                                            | NZB, 129P1/ReJ, 129/SvJ                                                            | <u>Immune:</u> increased levels of IgE; exaggerated IgE response; enhanced resistance and protection against parasitic infestations. <sup>38,39</sup><br><br><u>Other:</u> N/A.                                                                                                                                                                                                                                                                                                                                                                                                                                                                                                                                                                                                                                                                                                 | N/A                                                                                       |
| <i>Foxn1</i>      | forkhead box N1                                      | 11  | Forkhead/winged-helix family of transcription factors; differentiation of keratinocytes; development of the thymus; regulation of keratin gene expression; regulation of genes involved in antigen processing and thymocyte selection. | <i>Foxn1</i> <sup>nu</sup>                                | nude                                                                                                                        | intragenic deletion; single bp; exon 3; frameshift with premature stop codon; LOF; recessive inheritance.                                                                                                                                                                                                                                                                                                                                                               | albino stock                                                                       | <u>Immune:</u> thymus agenesis/dysgenesis; developmental failure of the thymic anlage; cystic changes of the thymic epithelial rudiments; reduced numbers of mature and functional T cells; extrathymic T cell lymphopoiesis with functional T cells development (especially in old mice exposed to "dirty" environment); partial defect in B cell development and function due to absence/paucity of functional T helper cells; increased number and cytotoxic capability of NK cells and M $\phi$ s; normal intraepithelial $\gamma\delta$ T cell repertoire at mucosal sites and skin; <sup>9,40-44</sup> autoimmunity; production of autoantibodies including anti-nuclear antibodies; systemic immune complex disease with glomerular involvement; <sup>9,45</sup> high susceptibility to infection by a broad spectrum of bacterial and viral pathogens; <sup>42,46</sup> | DiGeorge syndrome; T cell immunodeficiency; congenital alopecia                           |

| Gene/Locus symbol | Gene/Locus name      | Chr | Function                                                                                                                                                                                                                                                                                                                   | Mutation or allelic variant symbol               | Mutation or allelic variant name                                    | Mutation or allelic variant detail                                                                                                                                                                                                                                                                                 | Original/affected strain/stock                                     | Phenotype                                                                                                                                                                                                                                                                                                                                                                                                                                                                                                                                                                                                                                                                                                                                                                                                                                                                                                                                                                                                                                                                          | Human disease models                                                                                   |
|-------------------|----------------------|-----|----------------------------------------------------------------------------------------------------------------------------------------------------------------------------------------------------------------------------------------------------------------------------------------------------------------------------|--------------------------------------------------|---------------------------------------------------------------------|--------------------------------------------------------------------------------------------------------------------------------------------------------------------------------------------------------------------------------------------------------------------------------------------------------------------|--------------------------------------------------------------------|------------------------------------------------------------------------------------------------------------------------------------------------------------------------------------------------------------------------------------------------------------------------------------------------------------------------------------------------------------------------------------------------------------------------------------------------------------------------------------------------------------------------------------------------------------------------------------------------------------------------------------------------------------------------------------------------------------------------------------------------------------------------------------------------------------------------------------------------------------------------------------------------------------------------------------------------------------------------------------------------------------------------------------------------------------------------------------|--------------------------------------------------------------------------------------------------------|
|                   |                      |     |                                                                                                                                                                                                                                                                                                                            |                                                  |                                                                     |                                                                                                                                                                                                                                                                                                                    |                                                                    | <u>Other</u> : grossly hairless (hence the term “nude”); normally cycling hair follicles; defects in follicular and epidermal keratinization; impaired hair shaft formation and eruption; <sup>9,47,48</sup> poor breeders; males with decreased serum levels of LH and FSH and impaired spermatogenesis; females with decreased serum levels of estradiol, progesterone, and thyroxine. <sup>9,49,50</sup>                                                                                                                                                                                                                                                                                                                                                                                                                                                                                                                                                                                                                                                                        |                                                                                                        |
| <i>Foxp3</i>      | forkhead box P3      | X   | forkhead/winged-helix family of transcriptional regulators; development and function of regulatory T cells; immune tolerance (especially self-tolerance).                                                                                                                                                                  | <i>Foxp3<sup>sf</sup></i>                        | scurfy                                                              | insertion mutation; 2 adenosine residues into exon 8, frameshift with premature stop codon; truncated protein lacking the carboxy-terminal forkhead domain; LOF; X-linked recessive inheritance.                                                                                                                   | MR stock                                                           | <u>Immune</u> : scaling and crusting dermatitis; CD4+ T cell-mediated autoimmune disorder; infiltrations of activated immune cells consisting of lymphocytes, DCs, Mφs, and eosinophils into several organs including skin, lungs, kidneys and liver; marked enlargement of peripheral lymph nodes and splenomegaly with proliferation/infiltration of activated lymphocytes, DCs, and Mφs; autoimmune hemolytic anemia; hypergammaglobulinemia; inability to properly regulate CD4+ T cell activation and function; overexpression of proinflammatory cytokines; impaired peripheral immune tolerance. <sup>51-53</sup><br><br><u>Other</u> : failure to thrive; early lethality (approx. 20-50 days of age); male infertility; significantly reduced expression of pituitary gonadotropins; arrested spermatogenesis; lack of transcriptional regulation of ErbB2 oncogene with increased incidence of spontaneous mammary carcinomas; impaired megakaryopoiesis. <sup>54-56</sup>                                                                                               | immune dysregulation-polyendocrinopathy-enteropathy-X-linked syndrome (IPEX); Wiskott-Aldrich syndrome |
| <i>Hc</i>         | hemolytic complement | 2   | complement system; innate immunity; C5a anaphylatoxin with spasmogenic and chemotactic activity; C5b subunit of the membrane attack complex.                                                                                                                                                                               | <i>Hc<sup>0</sup></i>                            | hemolytic complement deficient                                      | intragenic deletion; 2 bp deletion near the 5' end of the gene; frameshift with premature stop codon 4 bases after the deletion; truncated transcript; LOF; recessive inheritance.                                                                                                                                 | A/HeJ, AKR/J, DBA/2J, NZB/B1NJ, SWR/J, and B10.D2/oSnJ             | <u>Immune</u> : impaired leukocyte chemotaxis; impaired bacterial and fungal clearance during opportunistic infections; defective granulomatous response; increased susceptibility to viral infections and DSS-induced colitis; decreased susceptibility to CIA, experimental airway inflammation, EAE, and autoimmune GN. <sup>57-68</sup><br><br><u>Other</u> : impaired liver regeneration; decreased susceptibility to reperfusion injury; delayed bile duct ligation-induced hepatobiliary fibrosis; delayed fracture healing. <sup>69,70</sup>                                                                                                                                                                                                                                                                                                                                                                                                                                                                                                                               | complement component 5 deficiency (C5D)                                                                |
| <i>Hr</i>         | hairless             | 14  | histone demethylase; demethylation of Lys9 on histone H3; transcriptional corepressor of multiple nuclear receptors including thyroid hormone receptor, the retinoic acid receptor-related orphan receptors, and the vitamin D receptors; regulation of hair cycle, epidermal maturation, neural activity, and cell cycle. | <i>Hr<sup>hr</sup></i><br><i>Hr<sup>rh</sup></i> | <i>Hr<sup>hr</sup></i> : hairless<br><i>Hr<sup>rh</sup></i> : rhino | <i>Hr<sup>hr</sup></i> : retroviral integration; intron 6; leukemia proviral sequences; aberrant splicing; LOF; recessive inheritance.<br><br><i>Hr<sup>rh</sup></i> : unknown mutation; mutant <i>Hr<sup>rh</sup></i> allele identified by a negative complementation test with <i>hr<sup>hr</sup></i> phenotype. | <i>Hr<sup>hr</sup></i> : HRS/J<br><i>Hr<sup>rh</sup></i> : RHJ/LeJ | <u>Immune</u> : early thymic cortical atrophy; impaired splenic T cell activation and expansion; defective splenic response to T-dependent antigens; defective Mφ activation; autoimmunity; hypergammaglobulinemia; production of autoantibodies including anti-nuclear antibodies; systemic immune complex disease with glomerular, hepatic, splenic, and skin involvement. <sup>9,71-73</sup><br><br><u>Other</u> : normal first hair cycle followed by rapid and complete hair loss/alopecia including vibrissae and cilia (eyelashes); dysregulation of catagen phase of hair cycle; failure of trichilemmal keratinization in the developing club hair; abnormal pylosebaceous units; hair follicle degeneration into utriculi and deep dermal cysts; sebaceous gland hyperplasia associated with deep dermal cysts; pyogranulomatous dermatitis; severe epidermal thickening/hyperplasia (mainly associated with the <i>Hr<sup>rh</sup></i> mutation); high incidence of thymic lymphoma; increased sensitivity to UV and chemically induced skin tumors. <sup>9,71,74</sup> | alopecia universalis congenita; atrichia with papular lesions; Marie Unna hereditary hypotrichosis     |
| <i>Il2</i>        | interleukin 2        | 3   | secreted cytokine; clonal expansion of B and T cells; immune cell activation including NK cells; development of regulatory T cells, effector T cells, and                                                                                                                                                                  | <i>Il2<sup>ml</sup></i>                          | mutation 1                                                          | undefined mutation; hypoactive variant <i>Il2</i> gene; smaller polyglutamine tract with shortening of the binding site; LOF;                                                                                                                                                                                      | MRL/MpJ, SJL/J, and NOD/ShiLtJ                                     | <u>Immune</u> : defective T cell activation; impaired AICD with decreased susceptibility to Fas-mediated apoptosis; predisposition to autoimmune conditions. <sup>75</sup><br><br><u>Other</u> : N/A.                                                                                                                                                                                                                                                                                                                                                                                                                                                                                                                                                                                                                                                                                                                                                                                                                                                                              | N/A                                                                                                    |

| Gene/Locus symbol | Gene/Locus name                             | Chr | Function                                                                                                                                                                                                           | Mutation or allelic variant symbol                 | Mutation or allelic variant name                                                                      | Mutation or allelic variant detail                                                                                                                                                                                                                                                                                                      | Original/affected strain/stock                                                                                                                                                                                                                                     | Phenotype                                                                                                                                                                                                                                                                                                                                                                                                                                                                                                                                                                                                                                                                                                                                                                                                                                                                                                                                                                                                                                                                                                                     | Human disease models                                  |
|-------------------|---------------------------------------------|-----|--------------------------------------------------------------------------------------------------------------------------------------------------------------------------------------------------------------------|----------------------------------------------------|-------------------------------------------------------------------------------------------------------|-----------------------------------------------------------------------------------------------------------------------------------------------------------------------------------------------------------------------------------------------------------------------------------------------------------------------------------------|--------------------------------------------------------------------------------------------------------------------------------------------------------------------------------------------------------------------------------------------------------------------|-------------------------------------------------------------------------------------------------------------------------------------------------------------------------------------------------------------------------------------------------------------------------------------------------------------------------------------------------------------------------------------------------------------------------------------------------------------------------------------------------------------------------------------------------------------------------------------------------------------------------------------------------------------------------------------------------------------------------------------------------------------------------------------------------------------------------------------------------------------------------------------------------------------------------------------------------------------------------------------------------------------------------------------------------------------------------------------------------------------------------------|-------------------------------------------------------|
|                   |                                             |     | memory T cells; immune tolerance; adaptive cell-mediated immunity.                                                                                                                                                 |                                                    |                                                                                                       | hypomorphic; recessive inheritance.                                                                                                                                                                                                                                                                                                     |                                                                                                                                                                                                                                                                    |                                                                                                                                                                                                                                                                                                                                                                                                                                                                                                                                                                                                                                                                                                                                                                                                                                                                                                                                                                                                                                                                                                                               |                                                       |
| <i>Kit</i>        | KIT proto-oncogene receptor tyrosine kinase | 5   | receptor tyrosine kinase protein; regulation of haematopoietic stem cell survival, differentiation, and proliferation; gametogenesis; mast cell development, migration, and function; melanogenesis.               | <i>Kit<sup>W</sup></i><br><i>Kit<sup>W-v</sup></i> | <i>Kit<sup>W</sup></i> : dominant spotting<br><br><i>Kit<sup>W-v</sup></i> : viable dominant spotting | <i>Kit<sup>W</sup></i> : single point mutation; G-to-A transition; disrupted splice donor site; exon skipping; aberrantly spliced transcripts; LOF; semidominant inheritance.<br><br><i>Kit<sup>W-v</sup></i> : C-to-T transition at nucleotide 2007; threonine to methionine substitution at codon 660; LOF; semidominant inheritance. | <i>Kit<sup>W</sup></i> : C57BL/6J, WB/ReJ<br><br><i>Kit<sup>W-v</sup></i> : C57BL/6J, MWT/Le, NFR/N, NFS/N, and WB/ReN<br><br><i>Kit<sup>W</sup>/Kit<sup>W-v</sup></i> (compound mutant): WB/ReJ × C57BL/6J F <sub>1</sub> (WBB6F <sub>1</sub> ) hybrid background | <u>Immune</u> : hematologic disorders, including macrocytic anemia, due to impaired pluripotent hematopoietic stem cell differentiation and expansion; impaired resistance to parasitic infection; mast cells deficiency. <sup>9,76-78</sup><br><br><u>Other</u> : early lethality (approx. 7 days of age) in <i>Kit<sup>W</sup></i> homozygotes; <i>Kit<sup>W-v</sup></i> homozygotes survive till maturity; defective gametogenesis due to impaired maturation of primordial germ cells during embryonic development; defective melanogenesis due to impaired melanoblasts migration and differentiation during embryonic development; homozygous mutants with diffusely unpigmented coat and normal eye pigmentation; heterozygous mutant with white spotting of the coat; hearing impairment due to abnormal development of intermediate cells in the stria vascularis. <sup>9,76,79-82</sup>                                                                                                                                                                                                                             | macrocytic anemia                                     |
| <i>Lep</i>        | leptin                                      | 6   | hormone; endocrine regulation of energy balance; central appetite-regulating factor; neutrophil activation and chemotaxis; Mφ phagocytosis; NK cytotoxicity; TH1 immune response; lymphocyte development.          | <i>Lep<sup>ob</sup></i>                            | obese                                                                                                 | single point mutation; C-to-T transition; codon 105; premature termination of the transcript; LOF; recessive inheritance.                                                                                                                                                                                                               | C57BL/6J, C57BL/KsJ                                                                                                                                                                                                                                                | <u>Immune</u> : decreased neutrophil activation and chemotaxis; impaired Mφ phagocytic capacity; defective DC development and maturation; deficient TH1 immune response; defective B and T cells development and survival; impaired NK cell cytotoxicity; reduced inflammatory mediators synthesis; enhanced starvation-induced immunosuppression; reduced susceptibility to experimental autoimmune conditions. <sup>83-88</sup><br><br><u>Other</u> : hyperphagy; obesity; type II diabetes mellitus; osteosclerosis/increased bone mass; hypogonadism. <sup>89,90</sup>                                                                                                                                                                                                                                                                                                                                                                                                                                                                                                                                                    | obesity, type 2 diabetes mellitus, metabolic syndrome |
| <i>Lepr</i>       | Leptin receptor                             | 4   | hormone receptor; endocrine regulation of energy balance; central appetite-regulating factor; neutrophil activation and chemotaxis; Mφ phagocytosis; NK cytotoxicity; TH1 immune response; lymphocyte development. | <i>Lepr<sup>db</sup></i>                           | diabetes                                                                                              | single point mutation, G-to-T transversion; abnormal splicing with premature termination of the transcript; loss of signal transduction function; LOF; recessive inheritance.                                                                                                                                                           | C57BL/KsJ                                                                                                                                                                                                                                                          | <u>Immune</u> : decreased neutrophil activation and chemotaxis; impaired Mφ phagocytic capacity; defective DC development and maturation; deficient TH1 immune response; defective B and T cells development and survival; impaired NK cell cytotoxicity; reduced inflammatory mediators synthesis; enhanced starvation-induced immunosuppression; reduced susceptibility to experimental autoimmune conditions. <sup>85,86,91-93</sup><br><br><u>Other</u> : hyperphagy; obesity; type II diabetes mellitus; osteosclerosis/increased bone mass; hypogonadism. <sup>90,94,95</sup>                                                                                                                                                                                                                                                                                                                                                                                                                                                                                                                                           | obesity, type 2 diabetes mellitus, metabolic syndrome |
| <i>Lyst</i>       | lysosomal trafficking regulator             | 13  | regulation of lysosome/endosomes intracellular trafficking.                                                                                                                                                        | <i>Lyst<sup>bg-J</sup></i>                         | beige Jackson                                                                                         | intragenic deletion; 3 bp, exon 54, codon 3741; highly conserved isoleucine loss, carboxy terminus; LOF; recessive inheritance.                                                                                                                                                                                                         | C57BL/6J                                                                                                                                                                                                                                                           | <u>Immune</u> : immune cell and leukocyte dysfunction; disorder of lysosome/secretory granule formation and function in different cell types including granulocytes, Mφs, NK, and cytotoxic T cells; evidence of giant lysosomes/secretory granules in granulocytes, lymphocytes, and mast cells; defective leukocyte chemotaxis; impaired phagolysosome formation; impaired MHC class II antigen presentation; defective leukocyte lytic granules exocytosis and release of bactericidal enzymes; increased susceptibility to opportunistic bacterial infections. <sup>96-99</sup><br><br><u>Other</u> : oculocutaneous hypopigmentation; abnormal enlargement, clumping, and distribution of melanin granules; evidence of giant lysosomes/secretory granules in various tissues/cell types including hepatocytes, renal proximal tubules, neurons, exocrine and endocrine pancreas, thyroid follicles, and type II pneumocytes; anemia and hemorrhagic diathesis due to dysfunction of platelet's α and δ granules; progressive neurological disorder accompanied by nearly complete loss of Purkinje cells. <sup>99</sup> | Chediak-Higashi syndrome                              |

| Gene/Locus symbol | Gene/Locus name                               | Chr | Function                                                                                                                                                                                                                               | Mutation or allelic variant symbol                                           | Mutation or allelic variant name                                                                                                                                     | Mutation or allelic variant detail                                                                                                                                                                                                                          | Original/affected strain/stock                                                                                                                                                                                                       | Phenotype                                                                                                                                                                                                                                                                                                                                                                                                                                                                                                                                                                                                                                                                                                                                              | Human disease models                                                                                                                      |
|-------------------|-----------------------------------------------|-----|----------------------------------------------------------------------------------------------------------------------------------------------------------------------------------------------------------------------------------------|------------------------------------------------------------------------------|----------------------------------------------------------------------------------------------------------------------------------------------------------------------|-------------------------------------------------------------------------------------------------------------------------------------------------------------------------------------------------------------------------------------------------------------|--------------------------------------------------------------------------------------------------------------------------------------------------------------------------------------------------------------------------------------|--------------------------------------------------------------------------------------------------------------------------------------------------------------------------------------------------------------------------------------------------------------------------------------------------------------------------------------------------------------------------------------------------------------------------------------------------------------------------------------------------------------------------------------------------------------------------------------------------------------------------------------------------------------------------------------------------------------------------------------------------------|-------------------------------------------------------------------------------------------------------------------------------------------|
| <i>Map3k14</i>    | mitogen-activated protein kinase kinase 14    | 11  | serine/threonine protein-kinase; promotion of canonical and non-canonical NF-κB signaling cascade; development of secondary lymphoid organs.                                                                                           | <i>Map3k14<sup>aly</sup></i>                                                 | alymphoplasia                                                                                                                                                        | single point mutation; G-to-A transition; replacement of a highly conserved glycine for an arginine at position 855; LOF; recessive inheritance.                                                                                                            | C57BL/6J                                                                                                                                                                                                                             | <b>Immune:</b> generalized aplasia of secondary lymphoid organs including lymph nodes, splenic white pulp, Peyer's patches, and isolated lymphoid follicles; lack of normal corticomedullary differentiation in the thymus; high susceptibility to opportunistic infections; defects of somatic hypermutation and immunoglobulin class switching; hypogammaglobulinemia; impaired humoral and cell-mediated immune response; progressive autoimmune condition with CD4+ T cell-rich infiltrates affecting exocrine glands (e.g. pancreas, salivary glands, and lacrimal glands) and other organs. <sup>100-107</sup><br><br><b>Other:</b> impaired mammary gland development and lactation. <sup>108</sup>                                             | Sjogren's syndrome                                                                                                                        |
| <i>Mitf</i>       | melanogenesis associated transcription factor | 6   | transcription factor; master regulator of eye and neural crest development; fate and differentiation of melanocyte, RPE, osteoclast, and mast cell; regulation of tyrosinase and tyrosinase-related protein 1 in melanocytes.          | <i>Mitf<sup>mi</sup></i>                                                     | microphthalmia                                                                                                                                                       | intragenic deletion; highly conserved arginine loss; impaired DNA binding; LOF; semidominant inheritance.                                                                                                                                                   | unspecified                                                                                                                                                                                                                          | <b>Immune:</b> impaired monocyte/Mφ, NK cell, basophil, and mast cell function; decreased Mφ chemotaxis. <sup>9,109,110</sup><br><br><b>Other:</b> alteration of skin and eye pigmentation; white spotting on the head, tail, and belly, reduced iris pigment (heterozygous mutants); complete absence of skin and eye pigmentation, lack of incisors (homozygous mutants); inner ear defects and deafness; colobomatous microphthalmia; impaired development of dorsal root ganglia and adrenal medulla; <sup>9,110</sup> osteopetrosis; dysfunctional osteoclasts due to cathepsin K and TRAP downregulation (both transcriptional target of Mitf); impaired endocrine control of calcium and phosphate metabolism/homeostasis. <sup>9,111-113</sup> | Waardenburg syndrome type 2A; Tietz albinism-deafness syndrome; coloboma; osteopetrosis; microphthalmia; macrocephaly; albinism; deafness |
| <i>Mitf</i>       | melanogenesis associated transcription factor | 6   | transcription factor; master regulator of eye and neural crest development; fate and differentiation of melanocyte, RPE, osteoclast, and mast cell; regulation of tyrosinase and tyrosinase-related protein 1 in melanocytes.          | <i>Mitf<sup>mi-vit</sup></i>                                                 | vitiligo                                                                                                                                                             | single point mutation; G-to-A transition; codon 222; aspartate to asparagine substitution in the helix 1 region of the protein; LOF; recessive inheritance.                                                                                                 | C57BL/6J                                                                                                                                                                                                                             | <b>Immune:</b> decreased number of Langerhans' cells in the interfollicular epidermis; attenuation of allergic contact dermatitis; decreased number of peritoneal mast cells.<br><br><b>Other:</b> congenital white spotting of the back and abdomen; progressive depigmentation with each hair molt resulting in complete pigment loss by 2 years of age; degeneration of follicular melanocytes without inflammation; iris pigment dispersion; degeneration and loss of melanocytes within the choroid; expansion of dysfunctional RPE cells with progressive retinal degeneration. <sup>9,114-116</sup>                                                                                                                                             | vitiligo                                                                                                                                  |
| <i>Mx1</i>        | MX dynamin-like GTPase 1                      | 16  | Mx GTPase protein family; innate immunity; IFNα an IFNβ-mediated response to intranuclear viruses including orthomyxoviruses and Thogoto virus; inhibition of viral replication.                                                       | <i>Mx1<sup>sl</sup></i><br><i>Mx1<sup>s2</sup></i><br><i>Mx1<sup>r</sup></i> | <i>Mx1<sup>sl</sup></i> : myxovirus susceptibility 1<br><br><i>Mx1<sup>s2</sup></i> : myxovirus susceptibility 2<br><br><i>Mx1<sup>r</sup></i> : myxovirus resistant | <i>Mx1<sup>sl</sup></i> : exon 9 to 11 deletion compared to the resistant ( <i>Mx<sup>r</sup></i> ) allele; LOF; recessive inheritance.<br><br><i>Mx1<sup>s2</sup></i> : exon 10; nonsense mutation resulting in a null allele; LOF; recessive inheritance. | <i>Mx1<sup>sl</sup></i> : most inbred strains including A/J, BALB/cJ, C57BL/6J, C3H/HeJ, and DBA/2J.<br><br><i>Mx1<sup>s2</sup></i> : CBA/J, CE/J, I/LnJ, and PERA/Ei.<br><br><i>Mx1<sup>r</sup></i> : A2G, SL/NiA, T9, and CAST/Ei. | <b>Immune:</b> (compared to feral mice carrying the <i>Mx1<sup>r</sup></i> allele) increased susceptibility to viral infections including orthomyxoviruses; ineffective IFNα an IFNβ-mediated response to viral infections. <sup>117,118</sup><br><br><b>Other:</b> N/A.                                                                                                                                                                                                                                                                                                                                                                                                                                                                               | susceptibility to viral diseases including orthomyxoviral infections                                                                      |
| <i>Mx2</i>        | MX dynamin-like GTPase 2                      | 16  | Mx GTPase protein family; innate immunity; IFNα an IFNβ-mediated response to intracytoplasmic viruses including vesicular stomatitis virus and bunyaviruses (e.g. La Crosse virus and Hantaan virus); inhibition of viral replication. | unspecified                                                                  | unspecified                                                                                                                                                          | insertion mutation; open reading frames (ORFs); single nucleotide (C) at position 1366 of Mx2 mRNA; frameshift with premature termination of the transcript; LOF; recessive inheritance.                                                                    | functional only in some feral mice (i.e. <i>Mus musculus musculus</i> and <i>Mus spretus</i> )                                                                                                                                       | <b>Immune:</b> (compared to feral mice expressing the functional form of <i>Mx2</i> ) increased susceptibility to viral infections including vesicular stomatitis virus and hantaviruses; ineffective IFNα an IFNβ-mediated response to viral infections. <sup>118-120</sup><br><br><b>Other:</b> N/A.                                                                                                                                                                                                                                                                                                                                                                                                                                                 | susceptibility to viral diseases including vesicular stomatitis and hantaviruses infections                                               |

| Gene/Locus symbol | Gene/Locus name                                      | Chr | Function                                                                                                                                                                                                                                                                                                                    | Mutation or allelic variant symbol                                                            | Mutation or allelic variant name                                                                                                                                                | Mutation or allelic variant detail                                                                                                                                                                                                                                                                                                                                | Original/affected strain/stock                                                                                                                                                                                                              | Phenotype                                                                                                                                                                                                                                                                                                                                                                                                                                                                                                                                                                                                                                                                                                                                                                            | Human disease models                                                                                      |
|-------------------|------------------------------------------------------|-----|-----------------------------------------------------------------------------------------------------------------------------------------------------------------------------------------------------------------------------------------------------------------------------------------------------------------------------|-----------------------------------------------------------------------------------------------|---------------------------------------------------------------------------------------------------------------------------------------------------------------------------------|-------------------------------------------------------------------------------------------------------------------------------------------------------------------------------------------------------------------------------------------------------------------------------------------------------------------------------------------------------------------|---------------------------------------------------------------------------------------------------------------------------------------------------------------------------------------------------------------------------------------------|--------------------------------------------------------------------------------------------------------------------------------------------------------------------------------------------------------------------------------------------------------------------------------------------------------------------------------------------------------------------------------------------------------------------------------------------------------------------------------------------------------------------------------------------------------------------------------------------------------------------------------------------------------------------------------------------------------------------------------------------------------------------------------------|-----------------------------------------------------------------------------------------------------------|
| <i>Oas1b</i>      | 2'-5' oligoadenylate synthetase 1B                   | 5   | oligoadenylate synthetase family; dsRNA-activated antiviral enzyme; innate immunity; IFN $\alpha$ and IFN $\beta$ -mediated response to viral infections; synthesis of 2',5'-oligoadenylates (2-5As); activation of latent ribonuclease L (RNase L); viral and endogenous RNA degradation; inhibition of viral replication. | <i>Oas1b<sup>Flv-mr</sup></i><br><i>Oas1b<sup>Flv-s</sup></i><br><i>Oas1b<sup>Flv-r</sup></i> | <i>Oas1b<sup>Flv-mr</sup></i> : minor flavivirus resistance<br><i>Oas1b<sup>Flv-s</sup></i> : flavivirus susceptibility<br><i>Oas1b<sup>Flv-r</sup></i> : flavivirus resistance | <i>Oas1b<sup>Flv-mr</sup></i> : nucleotide substitutions; 14 amino acid substitutions; LOF; hypomorphic; dominant inheritance.<br><i>Oas1b<sup>Flv-s</sup></i> : single point mutation; C-to-T transition; premature stop codon; protein lacking 30% of the C-terminal region; LOF; dominant inheritance.                                                         | <i>Oas1b<sup>Flv-mr</sup></i> : wild-derived strain MOLD/RKJ<br><i>Oas1b<sup>Flv-s</sup></i> : most of the laboratory mouse strains<br><i>Oas1b<sup>Flv-r</sup></i> : most wild-derived strains including BSVR, BRVR, CASA/RK, and CAST/Ei. | <b>Immune:</b> (compared to the wild-derived strains carrying the <i>Oas1b<sup>Flv-r</sup></i> allele) partial ( <i>Oas1b<sup>Flv-mr</sup></i> ) and full ( <i>Oas1b<sup>Flv-s</sup></i> ) susceptibility to flaviviral infections including Yellow Fever, Murray Valley Encephalitis virus, Dengue Fever, West Nile Fever, Japanese Encephalitis, and St. Louis Encephalitis. <sup>121-123</sup><br><b>Other:</b> N/A.                                                                                                                                                                                                                                                                                                                                                              | susceptibility to viral diseases including flaviviruses infections                                        |
| <i>Ostm1</i>      | osteopetrosis associated transmembrane protein 1     | 10  | melanocyte development; melanosome maturation; osteoclasts development; osteoclast ruffled border function; lysosome biology.                                                                                                                                                                                               | <i>Ostm1<sup>bl</sup></i>                                                                     | grey-lethal                                                                                                                                                                     | Intragenic deletion; 5' region of the gene including promoter, first exon and part of first intron; evidence of transposon insertion at the deletion breakpoint; LOF; recessive inheritance.                                                                                                                                                                      | STOCK Tyr <sup>c-e</sup>                                                                                                                                                                                                                    | <b>Immune:</b> immunodeficiency likely resulting from a stress response; thymus atrophy and lymphocyte depletion. <sup>9</sup><br><b>Other:</b> early lethality (approx. 20 to 40 days of age); failure to thrive; coat color defect; osteopetrosis resulting in abnormal skeletal development; unerupted incisors; absence of marrow cavities in long bones; decreased circulating leukocyte counts; poorly regenerative anemia; dysfunctional osteoclasts (impaired acidification of Howship's lacuna); parafollicular C cells hyperplasia associated with hypocalcemia, hypophosphatemia, and vitamin D metabolism; neurodegeneration associated with neuronal accumulation of autophagosomes and lysosomal storage disorder. <sup>124-126</sup>                                  | autosomal recessive osteopetrosis                                                                         |
| <i>Pou1f1</i>     | POU domain, class 1, transcription factor 1          | 16  | transcription factor; pituitary development; transcriptional activation of pituitary somatotropes, lactotropes, and thyrotropes.                                                                                                                                                                                            | <i>Pou1f1<sup>dw</sup></i><br><i>Pou1f1<sup>dwl</sup></i>                                     | <i>Pou1f1<sup>dw</sup></i> : Snell dwarf<br><i>Pou1f1<sup>dwl</sup></i> : dwarf-J                                                                                               | <i>Pou1f1<sup>dw</sup></i> : single point mutation; G-to-T transversion; codon 261; tryptophan to cysteine conversion in the homeodomain; LOF; semidominant inheritance.<br><i>Pou1f1<sup>dwl</sup></i> : chromosomal inversion or insertion of greater than 4kb in the gene; LOF; semidominant inheritance.                                                      | <i>Pou1f1<sup>dw</sup></i> : DW/J<br><i>Pou1f1<sup>dwl</sup></i> : C3H/HeJ                                                                                                                                                                  | <b>Immune:</b> delayed immune system maturation and development of immunocompetence; impaired T and B cell development and function; hypoplasia/atrophy of primary and secondary lymphoid organs (mainly affecting the T cell domains); partial rescue of immune defects via hormonal therapy (GH, IGF-I, prolactin, thyroxin). <sup>127-134</sup><br><b>Other:</b> growth retardation; adenohipophys hypoplasia; longevity and delayed aging resulting from somatotropic (GH/IGF-I) axis deficiency, lactotropes and thyrotropes deficiency; enhanced resistance to oxidative stress; reduced frequency of spontaneous tumor development; deafness with abnormal development and degeneration of Corti's organ; abnormal cerebellar and hippocampal development. <sup>135-143</sup> | panhypopituitary dwarfism; combined pituitary hormone deficiency 2                                        |
| <i>Prkdc</i>      | protein kinase, DNA activated, catalytic polypeptide | 16  | catalytic subunit of the DNA-dependent protein kinase; sensor for DNA damage; DNA NHEJ; DSB repair; V(D)J recombination.                                                                                                                                                                                                    | <i>Prkdc<sup>scid</sup></i><br><i>Prkdc<sup>dwnph</sup></i>                                   | <i>Prkdc<sup>scid</sup></i> : severe combined immunodeficiency<br><i>Prkdc<sup>dwnph</sup></i> : BALB/c                                                                         | <i>Prkdc<sup>scid</sup></i> : single point mutation; T-to-A transversion; premature stop codon; LOF; recessive inheritance.<br><i>Prkdc<sup>dwnph</sup></i> : single point mutations; A-to-G transition; methionine to valine substitution at codon 3844; C-to-T transition; arginine to cysteine substitution at codon 2140; hypomorphic; recessive inheritance. | <i>Prkdc<sup>scid</sup></i> : C.B-17<br><i>Prkdc<sup>dwnph</sup></i> : BALB/c                                                                                                                                                               | <b>Immune</b> (only <i>Prkdc<sup>scid</sup></i> ): V(D)J recombination defect; arrested B and T lymphocyte development at the pro-B and the pro-T cell stages; lack of mature and functional B cell and T cell; inability to mount an adaptive immune response; increased NK cell and hemolytic complement activity; leaky phenotype with generation of functional B and T cells clones (especially in old mice exposed to "dirty" environment); increased susceptibility to opportunistic bacterial infections. <sup>144-149</sup><br><b>Other:</b> dysfunctional DSB repair mechanism; high frequency of thymic lymphoma development and increased susceptibility to ionizing radiation-induced tumors. <sup>150-153</sup>                                                         | severe combined immunodeficiency, autosomal recessive, T cell-negative, B cell-negative, NK cell-positive |
| <i>Prop1</i>      | paired like homeodomain factor 1                     | 11  | transcription factor; pituitary development; transcriptional activation of pituitary                                                                                                                                                                                                                                        | <i>Prop1<sup>df</sup></i>                                                                     | Ames dwarf                                                                                                                                                                      | single point mutation, T-to-C transition; serine to proline substitution within the $\alpha$ 1 helix of the                                                                                                                                                                                                                                                       | Goodale large mice x pink-eyed stock, NFR/N                                                                                                                                                                                                 | <b>Immune:</b> T cell depletion from both primary and secondary lymphoid organs; reduction in DP T cells in the thymus; abnormal presence of DP T cells in the lymph nodes; decrease in pre-, pro-, and total B cell numbers; overall impaired cell-                                                                                                                                                                                                                                                                                                                                                                                                                                                                                                                                 | panhypopituitary dwarfism, combined pituitary hormone deficiency 2                                        |

| Gene/Locus symbol | Gene/Locus name                                   | Chr | Function                                                                                                                                                                                                                                                                                       | Mutation or allelic variant symbol                                 | Mutation or allelic variant name                                                                                                                           | Mutation or allelic variant detail                                                                                                                                                                                                                                                                                                                                                 | Original/affected strain/stock                                                                     | Phenotype                                                                                                                                                                                                                                                                                                                                                                                                                                                                                                                                                                                                                                                                                                                                                                                                                                                                                                                                                                                                                                                                                                                                                                                                                                                                                                                                                           | Human disease models                                                                                                       |
|-------------------|---------------------------------------------------|-----|------------------------------------------------------------------------------------------------------------------------------------------------------------------------------------------------------------------------------------------------------------------------------------------------|--------------------------------------------------------------------|------------------------------------------------------------------------------------------------------------------------------------------------------------|------------------------------------------------------------------------------------------------------------------------------------------------------------------------------------------------------------------------------------------------------------------------------------------------------------------------------------------------------------------------------------|----------------------------------------------------------------------------------------------------|---------------------------------------------------------------------------------------------------------------------------------------------------------------------------------------------------------------------------------------------------------------------------------------------------------------------------------------------------------------------------------------------------------------------------------------------------------------------------------------------------------------------------------------------------------------------------------------------------------------------------------------------------------------------------------------------------------------------------------------------------------------------------------------------------------------------------------------------------------------------------------------------------------------------------------------------------------------------------------------------------------------------------------------------------------------------------------------------------------------------------------------------------------------------------------------------------------------------------------------------------------------------------------------------------------------------------------------------------------------------|----------------------------------------------------------------------------------------------------------------------------|
|                   |                                                   |     | gonadotropes, somatotropes, lactotropes and thyrotropes.                                                                                                                                                                                                                                       |                                                                    |                                                                                                                                                            | homeodomain (amino acid 83); LOF; recessive inheritance.                                                                                                                                                                                                                                                                                                                           |                                                                                                    | mediated and humoral immunity; reduced NK activity; adiponectin-dependent reduced level of pro-inflammatory cytokines; anti-inflammatory immune skewing; partial rescue of immune defects via hormonal therapy (GH, IGF-I, prolactin, thyroxin). <sup>130,133,134,154-156</sup><br><br><u>Other:</u> growth retardation; longevity and delayed aging resulting from somatotropic (GH/IGF-I) axis deficiency; lactotropes and thyrotropes deficiency; enhanced resistance to oxidative stress; reduced frequency of spontaneous tumor development. <sup>133,157-159</sup>                                                                                                                                                                                                                                                                                                                                                                                                                                                                                                                                                                                                                                                                                                                                                                                            |                                                                                                                            |
| <i>Ptpr6</i>      | protein tyrosine phosphatase, non-receptor type 6 | 6   | protein tyrosine phosphatase (PTP) family; dephosphorylation of diverse phospho-proteins for the regulation of different signaling pathways involved in hematopoiesis and immune-inflammatory cell activation; cell growth; proliferation; differentiation; regulation of glucose homeostasis. | <i>Ptpr6<sup>me</sup></i><br><i>Ptpr6<sup>me-v</sup></i>           | <i>Ptpr6<sup>me</sup></i> : motheaten<br><i>Ptpr6<sup>me-v</sup></i> : viable motheaten                                                                    | <i>Ptpr6<sup>me</sup></i> : intragenic deletion; single bp; cryptic splicing site; aberrant splicing; deletion of a 101 bp segment in the encoded transcript; frameshift in the encoded protein; LOF; recessive inheritance.<br><br><i>Ptpr6<sup>me-v</sup></i> : single point mutation; T-to-A transversion splice consensus site; aberrant splicing; LOF; recessive inheritance. | C57BL/6J                                                                                           | <u>Immune:</u> systemic autoimmune condition; lethal pneumonitis (eosinophilic crystalline pneumonia); progressive neutrophilic dermatitis with patchy hair loss (hence the term "motheaten"); unregulated expansion of activated granulocytes and Mφs; abnormal expansion of reactive plasma cells; hypergammaglobulinemia; production of autoantibodies including anti-nuclear antibodies; systemic immune complex disease with glomerular, splenic, and skin involvement; eosinophil and mast cell hyper-responsiveness; immunodeficiency; early thymic cortical atrophy; splenic white pulp loss associated with massive EMH; loss of lymphoid follicles in lymph node and Peyer's patches; defective B and T cell maturation, activation, and expansion; overall reduced B cell population; expanded population of CD5+ B1a B cells; progressive T cell depletion; TH2-biased activation of the immune response; defective NK differentiation and function. <sup>9,160-162</sup><br><br><u>Other:</u> failure to thrive; mean survival time of approx. 4 and 9 weeks for motheaten and motheaten viable, respectively; increased glucose tolerance and insulin sensitivity; depletion of Leydig's cells, lowered testosterone levels, and impaired spermatogenesis; decreased bone density due to unregulated osteoclast activity. <sup>9,68,161,163-165</sup> | N/A                                                                                                                        |
| <i>Rab27a</i>     | RAB27A, member RAS oncogene family                | 9   | Ras superfamily of GTPases; member of the Rab family of proteins; secretory granule maturation and function; regulation of vesicular fusion, trafficking and exocytotic pathway.                                                                                                               | <i>Rab27a<sup>dsh</sup></i>                                        | ashen                                                                                                                                                      | single point mutation; A-to-T transversion; splice donor site downstream of exon 4; activation of two cryptic splice donor sites and the addition of an intron; LOF; recessive inheritance.                                                                                                                                                                                        | C3H/HeSn                                                                                           | <u>Immune:</u> defective secretory granule exocytosis in leukocytes including cytotoxic T cells, NK cells, eosinophils, neutrophils, and mast cells; hemophagocytic lymphohistiocytosis-like syndrome upon LCMV infection. <sup>166-170</sup><br><br><u>Other:</u> oculocutaneous hypopigmentation; defective trafficking of melanosomes; increased bleeding times; reduction in the number of platelet-dense granules; glucose intolerance without signs of peripheral insulin resistance or insulin deficiency in the pancreas; defective exocytosis of insulin granules in pancreatic β cells; impaired release of zymogenic granules from the pancreatic acini. <sup>166,171-174</sup>                                                                                                                                                                                                                                                                                                                                                                                                                                                                                                                                                                                                                                                                          | Griscelli syndrome type 2; hemophagocytic lymphohistiocytosis; Hermansky-Pudlak syndrome; platelet storage pool deficiency |
| <i>Sharpin</i>    | SHANK-associated RH domain interacting protein    | 15  | component of the LUBAC; substrates polyubiquitination; regulation of NF-κB signaling and TNF-induced cell death.                                                                                                                                                                               | <i>Sharpin<sup>cpdm</sup></i><br><i>Sharpin<sup>cpdm-Dem</sup></i> | <i>Sharpin<sup>cpdm</sup></i> : chronic proliferative dermatitis<br><br><i>Sharpin<sup>cpdm-Dem</sup></i> : chronic proliferative dermatitis, Peter Demant | <i>Sharpin<sup>cpdm</sup></i> : intragenic deletion; single bp in the 3' end of exon 1; frameshift with premature stop codon; LOF; recessive inheritance.<br><br><i>Sharpin<sup>cpdm-Dem</sup></i> : single point mutation and intragenic deletion; C-to-A transition; near the 5' end of exon 1; 14 bp deletion of nucleotides 438-451; frameshift with premature                 | <i>Sharpin<sup>cpdm</sup></i> : C57BL/KaLawRij<br><br><i>Sharpin<sup>cpdm-Dem</sup></i> : OcB3/Dem | <u>Immune:</u> chronic progressive proliferative and eosinophilic dermatitis; clinically apparent at 3-4 weeks of age; systemic eosinophilic inflammation; eosinophilia; defects in secondary lymphoid organ development; absent Peyer's patches; spleen and lymph nodes without B cell follicles, follicular DCs and germinal centers; poorly defined B and T cell domains in the spleen with absence of marginal zone; IgG, IgA and IgE. <sup>175,176</sup><br><br><u>Other:</u> N/A.                                                                                                                                                                                                                                                                                                                                                                                                                                                                                                                                                                                                                                                                                                                                                                                                                                                                             | atopic dermatitis; hypereosinophilic syndromes                                                                             |



| Gene/Locus symbol | Gene/Locus name                                                                     | Chr | Function                                                                                                                                                                                                                                                                                                                                                   | Mutation or allelic variant symbol                           | Mutation or allelic variant name                                                                                                                             | Mutation or allelic variant detail                                                                                                                                                                                                                                                                           | Original/affected strain/stock                                                                                                                   | Phenotype                                                                                                                                                                                                                                                                                                                                                                                                                                                                                                                                                                                                                                                                                                                                                                                                                                                                                                                                                                                                                  | Human disease models                                                                                                                                                      |
|-------------------|-------------------------------------------------------------------------------------|-----|------------------------------------------------------------------------------------------------------------------------------------------------------------------------------------------------------------------------------------------------------------------------------------------------------------------------------------------------------------|--------------------------------------------------------------|--------------------------------------------------------------------------------------------------------------------------------------------------------------|--------------------------------------------------------------------------------------------------------------------------------------------------------------------------------------------------------------------------------------------------------------------------------------------------------------|--------------------------------------------------------------------------------------------------------------------------------------------------|----------------------------------------------------------------------------------------------------------------------------------------------------------------------------------------------------------------------------------------------------------------------------------------------------------------------------------------------------------------------------------------------------------------------------------------------------------------------------------------------------------------------------------------------------------------------------------------------------------------------------------------------------------------------------------------------------------------------------------------------------------------------------------------------------------------------------------------------------------------------------------------------------------------------------------------------------------------------------------------------------------------------------|---------------------------------------------------------------------------------------------------------------------------------------------------------------------------|
|                   |                                                                                     |     |                                                                                                                                                                                                                                                                                                                                                            |                                                              |                                                                                                                                                              | stop codon; LOF; recessive inheritance.                                                                                                                                                                                                                                                                      |                                                                                                                                                  |                                                                                                                                                                                                                                                                                                                                                                                                                                                                                                                                                                                                                                                                                                                                                                                                                                                                                                                                                                                                                            |                                                                                                                                                                           |
| <i>Slc11a1</i>    | solute carrier family 11 (proton-coupled divalent metal ion transporters), member 1 | 1   | Mφ/monocyte-specific divalent transition metal transmembrane transporter; phagosome/phagolysosome maturation; regulation of intracellular iron metabolism; activation of Mφs, DCs, and γδ T cells; resistance to intracellular/phagocytized pathogens including <i>Mycobacterium</i> spp, <i>Salmonella typhimurium</i> , and <i>Leishmania donovani</i> . | <i>Slc11a1<sup>h</sup></i> ;<br><i>Slc11a1<sup>f</sup></i>   | <i>Slc11a1<sup>h</sup></i> : pathogen susceptibility<br><i>Slc11a1<sup>f</sup></i> : host resistance                                                         | <i>Slc11a1<sup>h</sup></i> : single point mutation; non-conservative replacement of glycine by aspartic acid at amino acid position 169 (Gly169Asp); nonfunctional misfolded protein; LOF; recessive inheritance.                                                                                            | <i>Slc11a1<sup>h</sup></i> : BALB/cJ, C57BL/6J, C57BL/10J, CE/J, DBA/1J, MOLF/Ei, and NZW/LacJ<br><i>Slc11a1<sup>f</sup></i> : 129X1/Sv, C3H/HeN | <b>Immune:</b> (susceptible strains compared to resistant ones) decreased iron sequestration from phagocytized bacteria; impaired phagosome/phagolysosome maturation; impaired activation of Mφs, DCs, and γδ T cells; deficient TH1-biased immune response; reduced antigen presentation ability of bacteria-derived antigens; susceptibility to infection by several pathogens, including diverse <i>Mycobacterium</i> species, <i>Salmonella typhimurium</i> , and <i>Leishmania donovani</i> . <sup>177-180</sup><br><br><b>Other:</b> N/A.                                                                                                                                                                                                                                                                                                                                                                                                                                                                            | susceptibility to infectious diseases such as tuberculosis and leprosy; susceptibility to immunoinflammatory conditions such as rheumatoid arthritis and Crohn's disease. |
| <i>Tcirg1</i>     | T cell, immune regulator 1, ATPase, H+ transporting, lysosomal V0 protein A3        | 19  | vacuolar H <sup>+</sup> -ATPase (V-ATPase), proton pump subunit; V-ATPase dependent organelle acidification; protein sorting; zymogen activation; receptor-mediated endocytosis; acidification-dependent bone resorption by osteoclasts.                                                                                                                   | <i>Tcirg1<sup>oc</sup></i>                                   | osteosclerotic                                                                                                                                               | intragenic deletion; 1579 bp region spanning exon 1 to 3; LOF; recessive inheritance.                                                                                                                                                                                                                        | C57BL/6J- <i>Vps33a<sup>df</sup></i>                                                                                                             | <b>Immune:</b> perturbed bone marrow microenvironment with defective hematopoiesis; increased bone marrow myelomonocytic differentiation; impaired B lymphopoiesis; abnormal expansion of B220+ and CD11b+ hematopoietic progenitors; reduced T cell activation; decreased circulating leukocyte counts. <sup>9,181,182</sup><br><br><b>Other:</b> failure to thrive; early lethality (approx. 30 to 40 days of age); dysfunctional osteoclasts (impaired acidification of Howship's lacunae); osteopetrosis resulting in abnormal skeletal development; craniofacial deformities (shortened snout and domed skull); unerupted incisors; clubbed feet; vestibular abnormalities; absence of marrow cavities in long bones; osteopetrosis combined with rickets-like growth plate changes with failure of endochondral ossification (osteopetrorickets); parafollicular C cells hyperplasia associated with hypocalcemia, hypophosphatemia and impaired vitamin D metabolism; gastric hypochlorhydria. <sup>9,183,184</sup> | autosomal recessive osteopetrosis 1; clubfoot.                                                                                                                            |
| <i>Tlr4</i>       | toll-like receptor 4                                                                | 4   | pattern recognition receptor (PRR) family; PAMPs/DAMPs recognition; activation of innate immunity; lipopolysaccharide (LPS); gram-negative bacteria; NF-κB signaling; synthesis of pro-inflammatory cytokines and chemokines; LPS-independent inflammatory responses; free fatty acids and oxidized LDL.                                                   | <i>Tlr4<sup>Lps-d</sup></i><br><i>Tlr4<sup>Lps-del</sup></i> | <i>Tlr4<sup>Lps-d</sup></i> : defective lipopolysaccharide response.<br><br><i>Tlr4<sup>Lps-del</sup></i> : defective lipopolysaccharide response, deletion. | <i>Tlr4<sup>Lps-d</sup></i> : single point mutation; C-to-A transversion; histidine to proline substitution at position 712; LOF; codominant inheritance.<br><br><i>Tlr4<sup>Lps-del</sup></i> : intragenic deletion, 7472 3bp region encompassing the entire <i>Tlr4</i> locus; LOF; recessive inheritance. | <i>Tlr4<sup>Lps-d</sup></i> : C3H/HeJ<br><br><i>Tlr4<sup>Lps-del</sup></i> : C57BL/10ScN                                                         | <b>Immune:</b> impaired recognition of TLR4-specific PAMPs and DAMPs including LPS, free fatty acids, and HSP60; defective activation of the innate immunity against specific bacterial, fungal and viral infections; abnormal regulation of TH1 vs TH2 immune response by DCs in response to TLR4-specific PAMPs and DAMPs; <sup>9,185-191</sup> protection from experimentally-induced autoimmune and immunoinflammatory conditions including GVHD, EAE, CIA, DSS colitis, and endotoxic shock. <sup>192-196</sup><br><br><b>Other:</b> protection from experimentally-induced alcoholic steatohepatitis, atherosclerosis, diabetes, insulin resistance, ischemia-reperfusion injury, metabolic syndrome, myocardial infarction, obesity, renal fibrosis, stroke, and traumatic injury; <sup>197-205</sup> delayed skin wound healing; <sup>206</sup> increased susceptibility to cutaneous chemical carcinogenesis. <sup>207</sup>                                                                                      | sepsis; cytokine storm; gram negative bacteria infections.                                                                                                                |
| <i>Tnf</i>        | tumor necrosis factor                                                               | 17  | multifunctional proinflammatory cytokine; TNF superfamily; innate immune response; chronic inflammation; endogenous pyrogen; apoptotic cell death; cachexia; acute phase response.                                                                                                                                                                         | <i>Tnf<sup>βpsm1</sup></i>                                   | bone phenotype spontaneous mutation 1                                                                                                                        | retrotransposon insertion into the 3' UTR; polyadenylation signal with premature termination of the transcript; GOF; dominant inheritance.                                                                                                                                                                   | unspecified; it involves BALB/c, C57BL/6 and 129/Sv                                                                                              | <b>Immune:</b> deregulated expression of mutant <i>Tnf</i> by myeloid derived immune/inflammatory cells; increased TNF signaling in synoviocytes; progressive polyarthritis mainly affecting the interphalangeal, metacarpophalangeal/metatarsophalangeal, carpo-metacarpal/tarso-metatarsal, and carpal/tarsal joints; absence of IgM or IgG rheumatoid factors; progressive inflammation, thickening, and fibrosis of the aortic and mitral valves; aortic root aneurysms (only observed on the BALB/c background). <sup>208</sup>                                                                                                                                                                                                                                                                                                                                                                                                                                                                                       | rheumatoid arthritis                                                                                                                                                      |



| Gene/Locus symbol | Gene/Locus name                            | Chr | Function                                                                                                                                                                    | Mutation or allelic variant symbol | Mutation or allelic variant name                                                                                 | Mutation or allelic variant detail                                                                                                                                                          | Original/affected strain/stock           | Phenotype                                                                                                                                                                                                                                                                                                                                                                                                                                                                                                                                                                                                                                                                                                                                                                                                                                                                                                                                                                                                                                                                                                                                                                                                                                   | Human disease models         |
|-------------------|--------------------------------------------|-----|-----------------------------------------------------------------------------------------------------------------------------------------------------------------------------|------------------------------------|------------------------------------------------------------------------------------------------------------------|---------------------------------------------------------------------------------------------------------------------------------------------------------------------------------------------|------------------------------------------|---------------------------------------------------------------------------------------------------------------------------------------------------------------------------------------------------------------------------------------------------------------------------------------------------------------------------------------------------------------------------------------------------------------------------------------------------------------------------------------------------------------------------------------------------------------------------------------------------------------------------------------------------------------------------------------------------------------------------------------------------------------------------------------------------------------------------------------------------------------------------------------------------------------------------------------------------------------------------------------------------------------------------------------------------------------------------------------------------------------------------------------------------------------------------------------------------------------------------------------------|------------------------------|
|                   |                                            |     |                                                                                                                                                                             |                                    |                                                                                                                  |                                                                                                                                                                                             |                                          | Other: N/A.                                                                                                                                                                                                                                                                                                                                                                                                                                                                                                                                                                                                                                                                                                                                                                                                                                                                                                                                                                                                                                                                                                                                                                                                                                 |                              |
| unknown           | unknown                                    | 1   | unknown                                                                                                                                                                     | <i>Dh</i>                          | dominant hemimelia                                                                                               | unknown mutation; semidominant inheritance.                                                                                                                                                 | crossbred stock                          | <b>Immune:</b> both homozygous and heterozygous mutants affected by congenital asplenia; heterozygous characterized by enlarged lymph nodes with decreased number of B cells and massive expansion of T cells; impaired T cells maturation; leukocytosis; thrombocytosis; decreased serum levels of IgM and IgG2. <sup>209</sup><br><br><b>Other:</b> early postnatal lethality in homozygous; defect in splanchnic mesoderm development; gastrointestinal and urogenital anomalies; skeletal abnormalities; hind limb malformations (hence hemimelia); reduction in the vertebral number. <sup>9,210,211</sup>                                                                                                                                                                                                                                                                                                                                                                                                                                                                                                                                                                                                                             | congenital asplenia          |
| unknown           | unknown                                    | Y   | unknown                                                                                                                                                                     | <i>Yaa</i>                         | accelerated autoimmunity and lymphoproliferation transposition; accelerated autoimmunity and lymphoproliferation | insertion mutation; 4 Mbp telomeric segment of the chrX translocated into the pseudoautosomal region of chrY; duplication about 19 genes including <i>Tlr7</i> ; GOF; Y-linked inheritance. | BXSB/MpJ                                 | <b>Immune:</b> promoting and/or accelerating autoimmune phenotypes in autoimmune-prone backgrounds (e.g. MRL/MpJ and NZW/LacJ) and mouse models including MRL/MpJ-Fas <sup>lpr</sup> ; translocation of <i>Tlr7</i> from the chrX into the chrY; duplication and upregulation/overexpression of <i>Tlr7</i> ( <i>Xist</i> normally inactivates one copy of <i>Tlr7</i> in females); increased TLR7 signaling in response to single-stranded RNA molecules; accelerated onset of autoimmunity in BXSB/MpJ males (50% mortality at 6 months) when compared to females (50% mortality at 20 months); systemic lupus erythematosus-like condition; CD4 T cell expansion and activation; overexpression of IL21; unregulated T <sub>H</sub> activation resulting from defective CD8 <sup>+</sup> Treg cell function; generalized lymphoid hyperplasia (involving both LNs and spleen); overall thymic cortical depletion with reduced epithelial network associated and lower number of thymocytes; monocytosis; hypergammaglobulinemia; hemolytic anemia; production of autoantibodies including anti-nuclear and anti-erythrocyte antibodies; severe immune complex-mediated GN and vasculitis. <sup>9,212-218</sup><br><br><b>Other:</b> N/A. | systemic lupus erythematosus |
| <i>Zap70</i>      | zeta-chain (TCR) associated protein kinase | 1   | member of the protein tyrosine kinase family; part of the T cell receptor; development of T lymphocytes and thymocytes; T lymphocyte receptor-mediated signal transduction. | <i>Zap70<sup>st</sup></i>          | strange                                                                                                          | single point mutation, C-to-T transition; arginine to cysteine substitution at codon 464; disruption of a highly conserved motif within the kinase domain; LOF; recessive inheritance.      | B6.129S2- <i>Cd28<sup>tm1Mak</sup>/J</i> | <b>Immune:</b> thymus hypoplasia; absence of mature T cells; thymocyte development is arrested at the CD4 <sup>+</sup> CD8 <sup>+</sup> DP stage of differentiation; impaired TCR signaling. <sup>219</sup><br><br><b>Other:</b> N/A.                                                                                                                                                                                                                                                                                                                                                                                                                                                                                                                                                                                                                                                                                                                                                                                                                                                                                                                                                                                                       | N/A                          |
| <i>Zap70</i>      | zeta-chain (TCR) associated protein kinase | 1   | member of the protein tyrosine kinase family; part of the T cell receptor; development of T lymphocytes and thymocytes; T lymphocyte receptor-mediated signal transduction. | <i>Zap70<sup>mlSaka</sup></i>      | Shimon Sakaguchi                                                                                                 | single point mutation; G-to-T transversion at nucleotide 489; tryptophan to cysteine substitution at codon 163; hypomorphic; LOF; recessive inheritance.                                    | BALB/cJ                                  | <b>Immune:</b> altered thymic T cell selection; T cell-mediated autoimmune polyarthritis mainly affecting the interphalangeal, metacarpophalangeal/metatarsophalangeal, carpo-metacarpal/tarso-metatarsal, and carpal/tarsal joints; interstitial pneumonitis; systemic vasculitis; granulomatous panniculitis; high titers of rheumatoid factor; autoantibodies specific for type II collagen; severe hypergammaglobulinaemia; high concentration of circulating immune complexes; induction of severe polyarthritis, interstitial pneumonitis, and ileitis after challenge with polysaccharides from <i>Saccharomyces cerevisiae</i> . <sup>220-222</sup><br><br><b>Other:</b> N/A.                                                                                                                                                                                                                                                                                                                                                                                                                                                                                                                                                       | rheumatoid arthritis         |

*Abbreviations and acronyms used in the table:*

A: adenine, AICD: activation-induced cell death, BCR: B cell receptor, bp: base pair, C: cytosine, Chr: chromosome, CIA: collagen-induced arthritis, CNS: central nervous system, CTL: cytotoxic T lymphocytes, DAMPs: damage-associated molecular patterns, DC: dendritic cell, DN: double negative, DSB: double strand break, DSS: dextrane sodium sulfate, EAE: experimental autoimmune encephalitis, EMH: extramedullary hematopoiesis, FSH: follicle stimulating hormone, G: guanine, GC: germinal center, GH: growth hormone, GN: glomerulonephritis, GOF: gain of function, GVHD: graft versus host disease, IFN: interferon, Ig: immunoglobulin, IGF-I: insulin-like growth factor 1, LCMV: lymphocytic choriomeningitis virus, LH: luteinizing hormone, LOF: Loss of function, LPS: lipopolysaccharide, M $\phi$ : macrophage, LUBAC: linear ubiquitin assembly complex, N/A: not applicable, not available, NF- $\kappa$ B: nuclear factor kappa-light-chain-enhancer of activated B cells, NHEJ: non-homologous end joining, NK: natural killer, PAMPs: pathogen-associated molecular patterns, RPE: retinal pigmented epithelium, ssDNA: single strand DNA, T: thymine, TAM: tumor associated macrophage, TCR: T cell receptor, TGF: transforming growth factor, TI: T independent antigen, TLR: Toll-like receptor, TNF: tumor necrosis factor.

## References

1. Clarke SH, Arnold LW. B-1 cell development: Evidence for an uncommitted immunoglobulin (ig)M+ B cell precursor in B-1 cell differentiation. *J Exp Med*. 1998;187(8):1325-1334. Accessed Dec 7, 2017.
2. Fiedler K, Sindrilaru A, Terszowski G, et al. Neutrophil development and function critically depend on bruton tyrosine kinase in a mouse model of X-linked agammaglobulinemia. *Blood*. 2011;117(4):1329-1339. Accessed Dec 7, 2017. doi: 10.1182/blood-2010-04-281170.
3. Hata D, Kawakami Y, Inagaki N, et al. Involvement of bruton's tyrosine kinase in FcepsilonRI-dependent mast cell degranulation and cytokine production. *J Exp Med*. 1998;187(8):1235-1247. Accessed Dec 7, 2017.
4. Kawakami Y, Kitaura J, Hata D, Yao L, Kawakami T. Functions of bruton's tyrosine kinase in mast and B cells. *J Leukoc Biol*. 1999;65(3):286-290. Accessed Dec 7, 2017.
5. Khan WN, Alt FW, Gerstein RM, et al. Defective B cell development and function in btk-deficient mice. *Immunity*. 1995;3(3):283-299. <http://www.sciencedirect.com/science/article/pii/1074761395901140>. Accessed Dec 7, 2017. doi: 10.1016/1074-7613(95)90114-0.
6. Dung HC, Swigart RH. Histo-pathologic observations of the nervous and lymphoid tissues of "lethargic" mutant mice. *Tex Rep Biol Med*. 1972;30(1):23-39. Accessed Nov 18, 2017.
7. Dung HC. Relationship between the adrenal cortex and thymic involution in "lethargic" mutant mice. *Am J Anat*. 1976;147(2):255-264. Accessed Nov 18, 2017. doi: 10.1002/aja.1001470209.
8. Dung HC, Lawson RL, Stevens M. A study of the increased serum level of IgG1 in 'lethargic' mice combined with a depressed thymus-dependent lymphoid system. *J Immunogenet*. 1977;4(4):287-293. Accessed Nov 18, 2017.
9. [NRC] National Research Council. *Immunodeficient rodents: A guide to their immunobiology, husbandry, and use*. Washington (DC): National Academies Press (US); 1989. <http://www.ncbi.nlm.nih.gov/books/NBK218200/>. Accessed Nov 16, 2017.
10. Khan Z, Jinnah HA. Paroxysmal dyskinesias in the lethargic mouse mutant. *J Neurosci*. 2002;22(18):8193-8200. Accessed Nov 18, 2017.
11. Burgess DL, Jones JM, Meisler MH, Noebels JL. Mutation of the Ca<sup>2+</sup> channel beta subunit gene *Cchb4* is associated with ataxia and seizures in the lethargic (lh) mouse. *Cell*. 1997;88(3):385-392. Accessed Nov 18, 2017.
12. Wiktor-Jedrzejczak W, Bartocci A, Ferrante AW, et al. Total absence of colony-stimulating factor 1 in the macrophage-deficient osteopetrotic (op/op) mouse. *Proc Natl Acad Sci U S A*. 1990;87(12):4828-4832. Accessed Dec 7, 2017.
13. Yoshida H, Hayashi S, Kunisada T, et al. The murine mutation osteopetrosis is in the coding region of the macrophage colony stimulating factor gene. *Nature*. 1990;345(6274):442-444. Accessed Dec 7, 2017. doi: 10.1038/345442a0.
14. Lu L, Osmond DG. Regulation of cell survival during B lymphopoiesis in mouse bone marrow: Enhanced pre-B-cell apoptosis in CSF-1-deficient op/op mutant mice. *Exp Hematol*. 2001;29(5):596-601. Accessed Dec 7, 2017.
15. Lin EY, Nguyen AV, Russell RG, Pollard JW. Colony-stimulating factor 1 promotes progression of mammary tumors to malignancy. *J Exp Med*. 2001;193(6):727-740. Accessed Dec 7, 2017.
16. Kanzaki S, Takada Y, Niida S, et al. Impaired vibration of auditory ossicles in osteopetrotic mice. *Am J Pathol*. 2011;178(3):1270-1278. Accessed Dec 7, 2017. doi: 10.1016/j.ajpath.2010.11.063.
17. Kondo Y, Ramaker JM, Radcliff AB, et al. Spontaneous optic nerve compression in the osteopetrotic (op/op) mouse: A novel model of myelination failure. *The Journal of neuroscience : the official journal of the Society for Neuroscience*. 2013;33(8):3514. <http://www.ncbi.nlm.nih.gov/pubmed/23426679>.
18. Ohira T, Wang XD, Ito T, et al. Macrophage deficiency in osteopetrotic (op/op) mice inhibits activation of satellite cells and prevents hypertrophy in single soleus fibers. *Am J Physiol , Cell Physiol*. 2015;308(10):848. Accessed Dec 6, 2017. doi: 10.1152/ajpcell.00348.2014.
19. Mahajan VS, Demissie E, Mattoo H, et al. Striking immune phenotypes in gene-targeted mice are driven by a copy-number variant originating from a commercially available C57BL/6 strain. *Cell Rep*. 2016;15(9):1901-1909. Accessed Dec 13, 2017. doi: 10.1016/j.celrep.2016.04.080.

20. Purtha WE, Swiecki M, Colonna M, Diamond MS, Bhattacharya D. Spontaneous mutation of the Dock2 gene in Irf5<sup>-/-</sup> mice complicates interpretation of type I interferon production and antibody responses. *Proc Natl Acad Sci U S A*. 2012;109(15):898. Accessed Dec 13, 2017. doi: 10.1073/pnas.1118155109.
21. Hedlund M, Tangvoranuntakul P, Takematsu H, et al. N-glycolylneuraminic acid deficiency in mice: Implications for human biology and evolution. *Mol Cell Biol*. 2007;27(12):4340-4346. Accessed Dec 13, 2017. doi: 10.1128/MCB.00379-07.
22. Libertin CR, Ling-Indeck L, Padilla M, Woloschak GE. Cytokine and T-cell subset abnormalities in immunodeficient wasted mice. *Mol Immunol*. 1994;31(10):753-759. Accessed Dec 10, 2017.
23. Newbery HJ, Loh DH, O'Donoghue JE, et al. Translation elongation factor eEF1A2 is essential for post-weaning survival in mice. *J Biol Chem*. 2007;282(39):28951-28959. Accessed Dec 10, 2017. doi: 10.1074/jbc.M703962200.
24. Lowri A Griffiths, Jennifer Doig, Antonia M D Churchhouse, et al. Haploinsufficiency for translation elongation factor eEF1A2 in aged mouse muscle and neurons is compatible with normal function. *PLoS One*. 2012;7(7):e41917. <http://www.ncbi.nlm.nih.gov/pubmed/22848658>. doi: 10.1371/journal.pone.0041917.
25. Nagata S, Suda T. Fas and fas ligand: Lpr and gld mutations. *Immunol Today*. 1995;16(1):39-43. Accessed Nov 7, 2017.
26. Cohen PL, Eisenberg RA. Lpr and gld: Single gene models of systemic autoimmunity and lymphoproliferative disease. *Annu Rev Immunol*. 1991;9:243-269. Accessed Apr 11, 2018. doi: 10.1146/annurev.iy.09.040191.001331.
27. Matsuzawa A, Moriyama T, Ogata Y, Katagiri T, Kimura M. A crucial role of the thymus in induction by the lprcg gene of lymphadenopathy with autoimmunity in the mouse. *Immunology*. 1992;75(4):688-692. Accessed Nov 9, 2017.
28. Kondo T, Tsunematsu T, Yamada A, et al. Acceleration of tumor growth due to dysfunction in M1 macrophages and enhanced angiogenesis in an animal model of autoimmune disease. *Lab Invest*. 2016;96(4):468-480. Accessed Apr 11, 2018. doi: 10.1038/labinvest.2015.166.
29. Perry D, Sang A, Yin Y, Zheng YY, Morel L. Murine models of systemic lupus erythematosus. *J Biomed Biotechnol*. 2011;2011:271694.
30. Kimura M, Matsuzawa A. Autoimmunity in mice bearing lprcg: A novel mutant gene. *Int Rev Immunol*. 1994;11(3):193-210. Accessed Nov 8, 2017.
31. Yasuda T, Zhang Y, Nagase H, et al. Immunological characterization of C3H mice congenic for fas(lprcg), C3h/HeJ-fas(lprcg)/fas(lprcg). *Lab Anim*. 2000;34(1):46-55. Accessed Nov 8, 2017. doi: 10.1258/002367700780578019.
32. Zuliani C, Kleber S, Klussmann S, et al. Control of neuronal branching by the death receptor CD95 (fas/apo-1). *Cell Death Differ*. 2006;13(1):31-40. Accessed Nov 7, 2017. doi: 10.1038/sj.cdd.4401720.
33. Ogi S, Tanji N, Yokoyama M, Takeuchi M, Terada N. Involvement of fas in the apoptosis of mouse germ cells induced by experimental cryptorchidism. *Urol Res*. 1998;26(1):17-21. Accessed Nov 7, 2017.
34. Lee J, Richburg JH, Younkin SC, Boekelheide K. The fas system is a key regulator of germ cell apoptosis in the testis. *Endocrinology*. 1997;138(5):2081-2088. Accessed Nov 8, 2017. doi: 10.1210/endo.138.5.5110.
35. Takahashi T, Tanaka M, Brannan CI, et al. Generalized lymphoproliferative disease in mice, caused by a point mutation in the fas ligand. *Cell*. 1994;76(6):969-976. Accessed Apr 11, 2018.
36. Lynch DH, Watson ML, Alderson MR, et al. The mouse fas-ligand gene is mutated in gld mice and is part of a TNF family gene cluster. *Immunity*. 1994;1(2):131-136. Accessed Nov 7, 2017.
37. Fingleton B, Carter KJ, Matrisian LM. Loss of functional fas ligand enhances intestinal tumorigenesis in the min mouse model. *Cancer Res*. 2007;67(10):4800-4806. Accessed Nov 7, 2017. doi: 10.1158/0008-5472.CAN-06-4473.
38. Ford JW, Sturgill JL, Conrad DH. 129/SvJ mice have mutated CD23 and hyper IgE. *Cell Immunol*. 2009;254(2):124-134. Accessed Mar 19, 2018. doi: 10.1016/j.cellimm.2008.08.003.
39. Lewis G, Rapsomaniki E, Bouriez T, et al. Hyper IgE in new zealand black mice due to a dominant-negative CD23 mutation. *Immunogenetics*. 2004;56(8):564-571. Accessed Mar 19, 2018. doi: 10.1007/s00251-004-0728-4.

40. González M, Merino R, González AL, Merino J. The ability of B cells to participate in allogeneic cognate T-B cell interactions in vitro depends on the presence of CD4+ T cells during their development. *J Immunol.* 1995;155(3):1091-1100. Accessed Nov 24, 2017.
41. Nonaka S, Naito T, Chen H, et al. Intestinal gamma delta T cells develop in mice lacking thymus, all lymph nodes, peyer's patches, and isolated lymphoid follicles. *J Immunol.* 2005;174(4):1906-1912. Accessed Nov 24, 2017.
42. Russo M, Invernizzi A, Gobbi A, Radaelli E. Diffuse scaling dermatitis in an athymic nude mouse. *Vet Pathol.* 2013;50(4):722-726. Accessed Nov 24, 2017. doi: 10.1177/0300985812463408.
43. Budzynski W, Radzikowski C. Cytotoxic cells in immunodeficient athymic mice. *Immunopharmacol Immunotoxicol.* 1994;16(3):319-346. Accessed Nov 25, 2017. doi: 10.3109/08923979409007097.
44. Saulius Zuklys, Adam Handel, Saule Zhanybekova, et al. Foxn1 regulates key target genes essential for T cell development in postnatal thymic epithelial cells. *Nature Immunology.* 2016;17(10):1206-1215. <http://www.ncbi.nlm.nih.gov/pubmed/27548434>. doi: 10.1038/ni.3537.
45. Morse HC, Steinberg AD, Schur PH, Reed ND. Spontaneous "autoimmune disease" in nude mice. *J Immunol.* 1974;113(2):688-697. Accessed Apr 11, 2018.
46. Ingle A, Ghim S, Joh J, Chepkoech I, Bennett Jenson A, Sundberg JP. Novel laboratory mouse papillomavirus (MusPV) infection. *Vet Pathol.* 2011;48(2):500-505. Accessed Nov 25, 2017. doi: 10.1177/0300985810377186.
47. Köpf-Maier P, Mboneko VF, Merker HJ. Nude mice are not hairless. A morphological study. *Acta Anat (Basel).* 1990;139(2):178-190. Accessed Nov 24, 2017.
48. Mecklenburg L, Paus R, Halata Z, Bechtold LS, Fleckman P, Sundberg JP. FOXN1 is critical for onycholemmal terminal differentiation in nude (Foxn1) mice. *J Invest Dermatol.* 2004;123(6):1001-1011. Accessed Nov 25, 2017. doi: 10.1111/j.0022-202X.2004.23442.x.
49. Goya RG, Cónsole GM, Sosa YE, Gómez Dumm CL, Dardenne M. Altered functional responses with preserved morphology of gonadotrophic cells in congenitally athymic mice. *Brain Behav Immun.* 2001;15(1):85-92. Accessed Nov 24, 2017. doi: 10.1006/brbi.2000.0595.
50. Köpf-Maier P, Mboneko VF. Anomalies in the hormonal status of athymic nude mice. *J Cancer Res Clin Oncol.* 1990;116(3):229-231. <https://link.springer.com/article/10.1007/BF01612895>. Accessed Nov 25, 2017. doi: 10.1007/BF01612895.
51. Godfrey VL, Wilkinson JE, Rinchik EM, Russell LB. Fatal lymphoreticular disease in the scurfy (sf) mouse requires T cells that mature in a sf thymic environment: Potential model for thymic education. *Proc Natl Acad Sci U S A.* 1991;88(13):5528-5532. Accessed Dec 23, 2017.
52. Godfrey VL, Wilkinson JE, Russell LB. X-linked lymphoreticular disease in the scurfy (sf) mutant mouse. *Am J Pathol.* 1991;138(6):1379-1387. Accessed Dec 23, 2017.
53. Kim CH. Migration and function of FoxP3+ regulatory T cells in the hematology system. *Exp Hematol.* 2006;34(8):1033-1040. Accessed Dec 24, 2017. doi: 10.1016/j.exphem.2006.03.014.
54. Bernard JJ, Seweryniak KE, Koniski AD, et al. Foxp3 regulates megakaryopoiesis and platelet function. *Arterioscler Thromb Vasc Biol.* 2009;29(11):1874-1882. Accessed Dec 24, 2017. doi: 10.1161/ATVBAHA.109.193805.
55. Jasurda JS, Jung DO, Froeter ED, et al. The forkhead transcription factor, FOXP3: A critical role in male fertility in mice. *Biol Reprod.* 2014;90(1):4. Accessed Dec 23, 2017. doi: 10.1095/biolreprod.113.112375.
56. Zuo T, Wang L, Morrison C, et al. FOXP3 is an X-linked breast cancer suppressor gene and an important repressor of the HER-2/ErbB2 oncogene. *Cell.* 2007;129(7):1275-1286. Accessed Dec 24, 2017. doi: 10.1016/j.cell.2007.04.034.
57. Actor JK, Breij E, Wetsel RA, Hoffmann H, Hunter RL, Jagannath C. A role for complement C5 in organism containment and granulomatous response during murine tuberculosis. *Scand J Immunol.* 2001;53(5):464-474. Accessed Nov 3, 2017.
58. Borders CW, Courtney A, Ronen K, et al. Requisite role for complement C5 and the C5a receptor in granulomatous response to mycobacterial glycolipid trehalose 6,6'-dimycolate. *Scand J Immunol.* 2005;62(2):123-130. Accessed Nov 3, 2017. doi: 10.1111/j.1365-3083.2005.01643.x.

59. Miller CG, Justus DE, Jayaraman S, Kotwal GJ. Severe and prolonged inflammatory response to localized cowpox virus infection in footpads of C5-deficient mice: Investigation of the role of host complement in poxvirus pathogenesis. *Cell Immunol.* 1995;162(2):326-332. Accessed Nov 3, 2017. doi: 10.1006/cimm.1995.1086.
60. Mori L, de Libero G. Genetic control of susceptibility to collagen-induced arthritis in T cell receptor beta-chain transgenic mice. *Arthritis Rheum.* 1998;41(2):256-262. Accessed Nov 3, 2017. doi: AID-ART9&gt;3.0.CO;2-E.
61. Moulton RA, Mashruwala MA, Smith AK, et al. Complement C5a anaphylatoxin is an innate determinant of dendritic cell-induced Th1 immunity to mycobacterium bovis BCG infection in mice. *J Leukoc Biol.* 2007;82(4):956-967. Accessed Nov 3, 2017. doi: 10.1189/jlb.0206119.
62. Mullick A, Elias M, Picard S, et al. Dysregulated inflammatory response to candida albicans in a C5-deficient mouse strain. *Infect Immun.* 2004;72(10):5868-5876. Accessed Nov 3, 2017. doi: 10.1128/IAI.72.10.5868-5876.2004.
63. Niculescu T, Weerth S, Niculescu F, et al. Effects of complement C5 on apoptosis in experimental autoimmune encephalomyelitis. *J Immunol.* 2004;172(9):5702-5706. Accessed Nov 3, 2017.
64. Nilsson UR, Müller-Eberhard HJ. Deficiency of the fifth component of complement in mice with an inherited complement defect. *J Exp Med.* 1967;125(1):1-16. Accessed Nov 3, 2017.
65. Ooi YM, Colten HR. Genetic defect in secretion of complement C5 in mice. *Nature.* 1979;282(5735):207-208. Accessed Nov 3, 2017.
66. Wetsel RA, Fleischer DT, Haviland DL. Deficiency of the murine fifth complement component (C5). A 2-base pair gene deletion in a 5'-exon. *J Biol Chem.* 1990;265(5):2435-2440. Accessed Nov 3, 2017.
67. Younger JG, Shankar-Sinha S, Mickiewicz M, et al. Murine complement interactions with pseudomonas aeruginosa and their consequences during pneumonia. *Am J Respir Cell Mol Biol.* 2003;29(4):432-438. Accessed Nov 3, 2017. doi: 10.1165/rcmb.2002-0145OC.
68. Aoki K, Didomenico E, Sims NA, et al. The tyrosine phosphatase SHP-1 is a negative regulator of osteoclastogenesis and osteoclast resorbing activity: Increased resorption and osteopenia in me(v)/me(v) mutant mice. *Bone.* 1999;25(3):261-267. Accessed Nov 23, 2017.
69. Ehrnthaller C, Huber-Lang M, Nilsson P, et al. Complement C3 and C5 deficiency affects fracture healing. *PLoS ONE.* 2013;8(11):e81341. Accessed Nov 3, 2017. doi: 10.1371/journal.pone.0081341.
70. Schmitt J, Roderfeld M, Sabrane K, et al. Complement factor C5 deficiency significantly delays the progression of biliary fibrosis in bile duct-ligated mice. *Biochem Biophys Res Commun.* 2012;418(3):445-450. Accessed Nov 3, 2017. doi: 10.1016/j.bbrc.2012.01.036.
71. Benavides F, Oberszyn TM, VanBuskirk AM, Reeve VE, Kusewitt DF. The hairless mouse in skin research. *Journal of Dermatological Science.* 2009;53(1):10-18. <http://www.sciencedirect.com/science/article/pii/S0923181108002764>. doi: 10.1016/j.jdermsci.2008.08.012.
72. Kawaji H, Tsukuda R, Nakaguchi T. Immunopathology of rhino mouse, an autosomal recessive mutant with murine lupus-like disease. *Acta Pathol Jpn.* 1980;30(4):515-530. Accessed Nov 18, 2017.
73. SAN JOSE I, GARCÍA-SUÁREZ O, HANNESTAD J, et al. The thymus of the hairless rhino-j (hr/hr-j) mice. *Journal of Anatomy.* 2001;198(4):399-406. <http://onlinelibrary.wiley.com/doi/10.1046/j.1469-7580.2001.19840399.x/abstract>. doi: 10.1046/j.1469-7580.2001.19840399.x.
74. Panteleyev AA, Botchkareva NV, Sundberg JP, Christiano AM, Paus R. The role of the hairless (hr) gene in the regulation of hair follicle catagen transformation. *Am J Pathol.* 1999;155(1):159-171. Accessed Nov 17, 2017. doi: 10.1016/S0002-9440(10)65110-3.
75. Choi Y, Simon-Stoos K, Puck JM. Hypo-active variant of IL-2 and associated decreased T cell activation contribute to impaired apoptosis in autoimmune prone MRL mice. *Eur J Immunol.* 2002;32(3):677-685. Accessed Dec 13, 2017. doi: AID-IMMU677&#62;3.0.CO;2-I.
76. Besmer P, Manova K, Duttlinger R, et al. The kit-ligand (steel factor) and its receptor c-kit/W: Pleiotropic roles in gametogenesis and melanogenesis. *Dev Suppl.* 1993:125-137. Accessed Dec 10, 2017.
77. Broxmeyer HE, Maze R, Miyazawa K, et al. The kit receptor and its ligand, steel factor, as regulators of hemopoiesis. *Cancer Cells.* 1991;3(12):480-487. Accessed Dec 10, 2017.
78. Yee NS, Paek I, Besmer P. Role of kit-ligand in proliferation and suppression of apoptosis in mast cells: Basis for radiosensitivity of white spotting and steel mutant mice. *J Exp Med.* 1994;179(6):1777-1787. Accessed Jan 29, 2018.



79. Bernstein A, Chabot B, Dubreuil P, et al. The mouse W/c-kit locus. *Ciba Found Symp.* 1990;148:172. Accessed Dec 10, 2017.
80. Chabot B, Stephenson DA, Chapman VM, Besmer P, Bernstein A. The proto-oncogene c-kit encoding a transmembrane tyrosine kinase receptor maps to the mouse W locus. *Nature.* 1988;335(6185):88-89. Accessed Dec 10, 2017. doi: 10.1038/335088a0.
81. Geissler EN, Ryan MA, Housman DE. The dominant-white spotting (W) locus of the mouse encodes the c-kit proto-oncogene. *Cell.* 1988;55(1):185-192. Accessed Dec 10, 2017.
82. Nocka K, Tan JC, Chiu E, et al. Molecular bases of dominant negative and loss of function mutations at the murine c-kit/white spotting locus: W37, wv, W41 and W. *EMBO J.* 1990;9(6):1805-1813. Accessed Dec 10, 2017.
83. Mancuso P, Gottschalk A, Phare SM, Peters-Golden M, Lukacs NW, Huffnagle GB. Leptin-deficient mice exhibit impaired host defense in gram-negative pneumonia. *J Immunol.* 2002;168(8):4018-4024. Accessed Oct 28, 2017.
84. Howard JK, Lord GM, Matarese G, et al. Leptin protects mice from starvation-induced lymphoid atrophy and increases thymic cellularity in ob/ob mice. *J Clin Invest.* 1999;104(8):1051-1059. Accessed Apr 11, 2018. doi: 10.1172/JCI6762.
85. Bernotiene E, Palmer G, Gabay C. The role of leptin in innate and adaptive immune responses. *Arthritis research & therapy.* 2006;8(5):217. <http://www.ncbi.nlm.nih.gov/pubmed/16879738>. doi: 10.1186/ar2004.
86. Lam QLK, Lu L. Role of leptin in immunity. *Cell Mol Immunol.* 2007;4(1):1-13. Accessed Oct 17, 2017.
87. Faggioni R, Feingold KR, Grunfeld C. Leptin regulation of the immune response and the immunodeficiency of malnutrition. *FASEB J.* 2001;15(14):2565-2571. Accessed Oct 16, 2017. doi: 10.1096/fj.01-0431rev.
88. Macia L, Delacre M, Abboud G, et al. Impairment of dendritic cell functionality and steady-state number in obese mice. *J Immunol.* 2006;177(9):5997-6006. Accessed Oct 16, 2017.
89. Lindström P. The physiology of obese-hyperglycemic mice [ob/ob mice]. *ScientificWorldJournal.* 2007;7:666-685. Accessed Nov 11, 2017. doi: 10.1100/tsw.2007.117.
90. Ducy P, Amling M, Takeda S, et al. Leptin inhibits bone formation through a hypothalamic relay: A central control of bone mass. *Cell.* 2000;100(2):197-207. Accessed Apr 11, 2018.
91. Tian Z, Sun R, Wei H, Gao B. Impaired natural killer (NK) cell activity in leptin receptor deficient mice: Leptin as a critical regulator in NK cell development and activation. *Biochem Biophys Res Commun.* 2002;298(3):297-302. Accessed Oct 28, 2017.
92. Zhao Y, Sun R, You L, Gao C, Tian Z. Expression of leptin receptors and response to leptin stimulation of human natural killer cell lines. *Biochem Biophys Res Commun.* 2003;300(2):247-252. Accessed Oct 17, 2017.
93. Lord GM, Matarese G, Howard JK, Baker RJ, Bloom SR, Lechler RI. Leptin modulates the T-cell immune response and reverses starvation-induced immunosuppression. *Nature.* 1998;394(6696):897-901. Accessed Oct 16, 2017. doi: 10.1038/29795.
94. Garris DR, Garris BL, Novikova L, Lau Y. Structural, metabolic and endocrine analysis of the diabetes (db/db) hypogonadal syndrome: Relationship to hypophyseal hypercytolipidemia. *Cell Tissue Res.* 2005;319(3):501-512. Accessed Apr 11, 2018. doi: 10.1007/s00441-004-1021-4.
95. Kobayashi K, Forte TM, Taniguchi S, Ishida BY, Oka K, Chan L. The db/db mouse, a model for diabetic dyslipidemia: Molecular characterization and effects of western diet feeding. *Metab Clin Exp.* 2000;49(1):22-31. Accessed Apr 11, 2018.
96. Bannai M, Oya H, Kawamura T, et al. Disparate effect of beige mutation on cytotoxic function between natural killer and natural killer T cells. *Immunology.* 2000;100(2):165-169. Accessed Oct 28, 2017.
97. Chatterjee P, Tiwari RK, Rath S, Bal V, George A. Modulation of antigen presentation and B cell receptor signaling in B cells of beige mice. *J Immunol.* 2012;188(6):2695-2702. Accessed Oct 28, 2017. doi: 10.4049/jimmunol.1101527.
98. Percy DH, Barta JR. Spontaneous and experimental infections in scid and scid/beige mice. *Lab Anim Sci.* 1993;43(2):127-132. Accessed Nov 12, 2017.
99. Spritz RA. Genetic defects in chediak-higashi syndrome and the beige mouse. *J Clin Immunol.* 1998;18(2):97-105. Accessed Nov 12, 2017.

100. Furukawa M, Sakamoto A, Kita Y, et al. T-cell receptor repertoire of infiltrating T cells in lachrymal glands, salivary glands and kidneys from alymphoplasia (aly) mutant mice: A new model for sjögren's syndrome. *Br J Rheumatol*. 1996;35(12):1223-1230. Accessed Jan 31, 2018.
101. Miyawaki S, Nakamura Y, Suzuka H, et al. A new mutation, aly, that induces a generalized lack of lymph nodes accompanied by immunodeficiency in mice. *Eur J Immunol*. 1994;24(2):429-434. Accessed Jan 31, 2018. doi: 10.1002/eji.1830240224.
102. Nonaka S, Naito T, Chen H, et al. Intestinal gamma delta T cells develop in mice lacking thymus, all lymph nodes, peyer's patches, and isolated lymphoid follicles. *J Immunol*. 2005;174(4):1906-1912. Accessed Jan 31, 2018.
103. Shinkura R, Matsuda F, Sakiyama T, et al. Defects of somatic hypermutation and class switching in alymphoplasia (aly) mutant mice. *Int Immunol*. 1996;8(7):1067-1075. Accessed Jan 31, 2018.
104. Shinkura R, Kitada K, Matsuda F, et al. Alymphoplasia is caused by a point mutation in the mouse gene encoding nf-kappa b-inducing kinase. *Nat Genet*. 1999;22(1):74-77. Accessed Jan 31, 2018. doi: 10.1038/8780.
105. Tsubata R, Tsubata T, Hiai H, et al. Autoimmune disease of exocrine organs in immunodeficient alymphoplasia mice: A spontaneous model for sjögren's syndrome. *Eur J Immunol*. 1996;26(11):2742-2748. Accessed Jan 31, 2018. doi: 10.1002/eji.1830261129.
106. Tsuneyama K, Kono N, Hosono M, et al. Aly/aly mice: A unique model of biliary disease. *Hepatology*. 1998;27(6):1499-1507. Accessed Jan 31, 2018. doi: 10.1002/hep.510270606.
107. Yasumizu R, Miyawaki S, Koba M, et al. Pathology of ALY mice: Congenital immunodeficiency with lymph node and peyer's patch defects. *Immunobiology*. 2000;202(3):213-225. Accessed Jan 31, 2018. doi: 10.1016/S0171-2985(00)80029-7.
108. Nishimura T, Koike R, Miyasaka M. Mammary glands of aly mice: Developmental changes and lactation-related expression of specific proteins, alpha-casein, GLyCAM-1 and MAdCAM-1. *Am J Reprod Immunol*. 2000;43(6):351-358. Accessed Jan 31, 2018.
109. Kim DK, Morie E, Ogihara H, et al. Different effect of various mutant MITF encoded by mi, mior, or miwh allele on phenotype of murine mast cells. *Blood*. 1999;93(12):4179-4186. Accessed Apr 11, 2018.
110. Steingrímsson E, Moore KJ, Lamoreux ML, et al. Molecular basis of mouse microphthalmia (mi) mutations helps explain their developmental and phenotypic consequences. *Nat Genet*. 1994;8(3):256-263. Accessed Apr 11, 2018. doi: 10.1038/ng1194-256.
111. Luchin A, Purdom G, Murphy K, et al. The microphthalmia transcription factor regulates expression of the tartrate-resistant acid phosphatase gene during terminal differentiation of osteoclasts. *J Bone Miner Res*. 2000;15(3):451-460. Accessed Nov 24, 2017. doi: 10.1359/jbmr.2000.15.3.451.
112. Scholtz CL, Chan KK. Complicated colobomatous microphthalmia in the microphthalmic (mi/mi) mouse. *Development*. 1987;99(4):501-508. Accessed Apr 17, 2018.
113. G. Motyckova, K. N. Weilbaecher, M. Horstmann, D. J. Rieman, D. Z. Fisher, D. E. Fisher. Linking osteopetrosis and pycnodysostosis: Regulation of cathepsin K expression by the microphthalmia transcription factor family. *Proceedings of the National Academy of Sciences of the United States of America*. 2001;98(10):5798-5803. <http://www.jstor.org/stable/3055707>. doi: 10.1073/pnas.091479298.
114. Anderson MG, Hawes NL, Trantow CM, Chang B, John SWM. Iris phenotypes and pigment dispersion caused by genes influencing pigmentation. *Pigment Cell & Melanoma Research*. 2008;21(5):565-578. <http://onlinelibrary.wiley.com/doi/10.1111/j.1755-148X.2008.00482.x/abstract>. doi: 10.1111/j.1755-148X.2008.00482.x.
115. Chang B, Hawes NL, Hurd RE, Davisson MT, Nusinowitz S, Heckenlively JR. Retinal degeneration mutants in the mouse. *Vision Res*. 2002;42(4):517-525. Accessed Dec 8, 2017.
116. Sidman RL, Kosaras B, Tang M. Pigment epithelial and retinal phenotypes in the vitiligo mivit, mutant mouse. *Invest Ophthalmol Vis Sci*. 1996;37(6):1097-1115. Accessed Dec 8, 2017.
117. Staeheli P, Grob R, Meier E, Sutcliffe JG, Haller O. Influenza virus-susceptible mice carry mx genes with a large deletion or a nonsense mutation. *Mol Cell Biol*. 1988;8(10):4518-4523. Accessed Dec 24, 2017.
118. Staeheli P, Sutcliffe JG. Identification of a second interferon-regulated murine mx gene. *Mol Cell Biol*. 1988;8(10):4524-4528. Accessed Apr 11, 2018.

119. Asano A, Jin HK, Watanabe T. Mouse Mx2 gene: Organization, mRNA expression and the role of the interferon-response promoter in its regulation. *Gene*. 2003;306:105-113. Accessed Apr 11, 2018.
120. Jin HK, Takada A, Kon Y, Haller O, Watanabe T. Identification of the murine Mx2 gene: Interferon-induced expression of the Mx2 protein from the feral mouse gene confers resistance to vesicular stomatitis virus. *J Virol*. 1999;73(6):4925-4930. Accessed Dec 27, 2017.
121. Pereygin AA, Scherbik SV, Zhulin IB, Stockman BM, Li Y, Brinton MA. Positional cloning of the murine flavivirus resistance gene. *Proc Natl Acad Sci U S A*. 2002;99(14):9322-9327. Accessed Dec 28, 2017. doi: 10.1073/pnas.142287799.
122. Sangster MY, Heliams DB, MacKenzie JS, Shellam GR. Genetic studies of flavivirus resistance in inbred strains derived from wild mice: Evidence for a new resistance allele at the flavivirus resistance locus (flv). *J Virol*. 1993;67(1):340-347. Accessed Dec 28, 2017.
123. Urosevic N, Silvia OJ, Sangster MY, Mansfield JP, Hodgetts SI, Shellam GR. Development and characterization of new flavivirus-resistant mouse strains bearing flv(r)-like and flv(mr) alleles from wild or wild-derived mice. *J Gen Virol*. 1999;80 ( Pt 4):897-906. Accessed Dec 28, 2017. doi: 10.1099/0022-1317-80-4-897.
124. Héraud C, Griffiths A, Pandruvada SNM, Kilimann MW, Pata M, Vacher J. Severe neurodegeneration with impaired autophagy mechanism triggered by ostm1 deficiency. *J Biol Chem*. 2014;289(20):13912-13925. Accessed Nov 2, 2017. doi: 10.1074/jbc.M113.537233.
125. Lange PF, Wartosch L, Jentsch TJ, Fuhrmann JC. CIC-7 requires Ostm1 as a beta-subunit to support bone resorption and lysosomal function. *Nature*. 2006;440(7081):220-223. Accessed Nov 2, 2017. doi: 10.1038/nature04535.
126. Rajapurohitam V, Chalhoub N, Benachenhou N, Neff L, Baron R, Vacher J. The mouse osteopetrotic grey-lethal mutation induces a defect in osteoclast maturation/function. *Bone*. 2001;28(5):513-523. Accessed Nov 2, 2017.
127. Baroni CD, Fabris N, Bertoli G. Effects of hormones on development and function of lymphoid tissues. synergistic action of thyroxin and somatotrophic hormone in pituitary dwarf mice. *Immunology*. 1969;17(2):303-314. Accessed Apr 12, 2018.
128. Dumont F, Robert F, Bischoff P. T and B lymphocytes in pituitary dwarf snell-bagg mice. *Immunology*. 1979;38(1):23-31. Accessed Apr 12, 2018.
129. Cross RJ, Bryson JS, Roszman TL. Immunologic disparity in the hypopituitary dwarf mouse. *J Immunol*. 1992;148(5):1347-1352. Accessed Nov 1, 2017.
130. Murphy WJ, Durum SK, Longo DL. Role of neuroendocrine hormones in murine T cell development. growth hormone exerts thymopoietic effects in vivo. *J Immunol*. 1992;149(12):3851-3857. Accessed Apr 12, 2018.
131. Montecino-Rodriguez E, Clark RG, Powell-Braxton L, Dorshkind K. Primary B cell development is impaired in mice with defects of the pituitary/thyroid axis. *J Immunol*. 1997;159(6):2712-2719. Accessed Nov 1, 2017.
132. Montecino-Rodriguez E, Clark R, Johnson A, Collins L, Dorshkind K. Defective B cell development in snell dwarf (dw/dw) mice can be corrected by thyroxine treatment. *J Immunol*. 1996;157(8):3334-3340. Accessed Nov 1, 2017.
133. Flurkey K, Papaconstantinou J, Miller RA, Harrison DE. Lifespan extension and delayed immune and collagen aging in mutant mice with defects in growth hormone production. *Proc Natl Acad Sci U S A*. 2001;98(12):6736-6741. Accessed Oct 31, 2017. doi: 10.1073/pnas.111158898.
134. Duquesnoy RJ. The pituitary dwarf mouse: A model for study of endocrine immunodeficiency disease. *Birth Defects Orig Artic Ser*. 1975;11(1):536-543. Accessed Apr 17, 2018.
135. Alderman JM, Flurkey K, Brooks NL, et al. Neuroendocrine inhibition of glucose production and resistance to cancer in dwarf mice. *Exp Gerontol*. 2009;44(1-2):26-33. Accessed Nov 1, 2017. doi: 10.1016/j.exger.2008.05.014.
136. Dozmorov I, Galecki A, Chang Y, Krzesicki R, Vergara M, Miller RA. Gene expression profile of long-lived snell dwarf mice. *J Gerontol A Biol Sci Med Sci*. 2002;57(3):99. Accessed Oct 31, 2017.
137. Flurkey K, Papaconstantinou J, Harrison DE. The snell dwarf mutation Pit1(dw) can increase life span in mice. *Mech Ageing Dev*. 2002;123(2-3):121-130. Accessed Oct 31, 2017.

138. Hsieh C, DeFord JH, Flurkey K, Harrison DE, Papaconstantinou J. Effects of the Pit1 mutation on the insulin signaling pathway: Implications on the longevity of the long-lived snell dwarf mouse. *Mech Ageing Dev.* 2002;123(9):1245-1255. Accessed Oct 31, 2017.
139. Leiser SF, Miller RA. Nrf2 signaling, a mechanism for cellular stress resistance in long-lived mice. *Mol Cell Biol.* 2010;30(3):871-884. Accessed Nov 1, 2017. doi: 10.1128/MCB.01145-09.
140. Madsen MA, Hsieh C, Boylston WH, Flurkey K, Harrison D, Papaconstantinou J. Altered oxidative stress response of the long-lived snell dwarf mouse. *Biochem Biophys Res Commun.* 2004;318(4):998-1005. Accessed Nov 1, 2017. doi: 10.1016/j.bbrc.2004.04.126.
141. Mustapha M, Fang Q, Gong T, et al. Deafness and permanently reduced potassium channel gene expression and function in hypothyroid Pit1dw mutants. *Journal of Neuroscience.* 2009;29(4):1212-1223. <http://www.jneurosci.org/cgi/content/abstract/29/4/1212>. doi: 10.1523/JNEUROSCI.4957-08.2009.
142. Sekiguchi M, Abe H, Moriya M, Tanaka O, Nowakowski RS. Cerebellar microfolia and other abnormalities of neuronal growth, migration, and lamination in the Pit1dw-J homozygote mutant mouse. *J Comp Neurol.* 1998;400(3):363-374. Accessed Nov 16, 2017.
143. Fang Q, Giordimaina AM, Dolan DF, Camper SA, Mustapha M. Genetic background of Prop1<sup>df</sup> mutants provides remarkable protection against hypothyroidism-induced hearing impairment. *Journal of the Association for Research in Otolaryngology.* 2012;13(2):173-184.
144. Bosma MJ, Carroll AM. The SCID mouse mutant: Definition, characterization, and potential uses. *Annu Rev Immunol.* 1991;9:323-350. Accessed Nov 12, 2017. doi: 10.1146/annurev.iy.09.040191.001543.
145. Hendrickson EA. The SCID mouse: Relevance as an animal model system for studying human disease. *Am J Pathol.* 1993;143(6):1511-1522. Accessed Apr 12, 2018.
146. Nonoyama S, Ochs HD. Immune deficiency in SCID mice. *Int Rev Immunol.* 1996;13(4):289-300. Accessed Apr 12, 2018.
147. Løvik M. The SCID (severe combined immunodeficiency) mouse--its biology and use in immunotoxicological research. *Arch Toxicol Suppl.* 1995;17:455-467. Accessed Apr 12, 2018.
148. Christianson SW, Greiner DL, Schweitzer IB, et al. Role of natural killer cells on engraftment of human lymphoid cells and on metastasis of human T-lymphoblastoid leukemia cells in C57BL/6J-scid mice and in C57BL/6J-scid bg mice. *Cell Immunol.* 1996;171(2):186-199. Accessed Nov 25, 2017. doi: 10.1006/cimm.1996.0193.
149. Leblond V, Autran B, Cesbron JY. The SCID mouse mutant: Definition and potential use as a model for immune and hematological disorders. *Hematol Cell Ther.* 1997;39(5):213-221. Accessed Apr 12, 2018.
150. Biedermann KA, Sun JR, Giaccia AJ, Tosto LM, Brown JM. Scid mutation in mice confers hypersensitivity to ionizing radiation and a deficiency in DNA double-strand break repair. *Proc Natl Acad Sci U S A.* 1991;88(4):1394-1397. Accessed Apr 12, 2018.
151. Chang C, Biedermann KA, Mezzina M, Brown JM. Characterization of the DNA double strand break repair defect in scid mice. *Cancer Res.* 1993;53(6):1244-1248. Accessed Apr 12, 2018.
152. Huang P, Westmoreland SV, Jain RK, Fukumura D. Spontaneous nonthymic tumors in SCID mice. *Comp Med.* 2011;61(3):227-234. Accessed Apr 12, 2018.
153. Monticello TM, Green DS, Yang H, Drain RL, Franco CT, Durham SK. Spontaneous thymic lymphoma in severe combined immunodeficiency (SCID) mice engrafted with human peripheral blood lymphocytes. *Vet Pathol.* 1994;31(3):393-395. Accessed Apr 12, 2018. doi: 10.1177/030098589403100318.
154. Wang Z, Al-Regaiey KA, Masternak MM, Bartke A. Adipocytokines and lipid levels in ames dwarf and calorie-restricted mice. *J Gerontol A Biol Sci Med Sci.* 2006;61(4):323-331. Accessed Apr 12, 2018.
155. Esquifino AI, Villanúa MA, Szary A, Yau J, Bartke A. Ectopic pituitary transplants restore immunocompetence in ames dwarf mice. *Acta Endocrinol.* 1991;125(1):67-72. Accessed Apr 12, 2018.
156. Duquesnoy RJ. Immunodeficiency of the thymus-dependent system of the ames dwarf mouse. *J Immunol.* 1972;108(6):1578-1590. Accessed Apr 12, 2018.

157. Bartke A, Brown-Borg H. Life extension in the dwarf mouse. *Curr Top Dev Biol.* 2004;63:189-225. Accessed Oct 29, 2017. doi: 10.1016/S0070-2153(04)63006-7.
158. Brown-Borg HM. The somatotrophic axis and longevity in mice. *Am J Physiol Endocrinol Metab.* 2015;309(6):503. Accessed Oct 29, 2017. doi: 10.1152/ajpendo.00262.2015.
159. Liang H, Masoro EJ, Nelson JF, Strong R, McMahan CA, Richardson A. Genetic mouse models of extended lifespan. *Exp Gerontol.* 2003;38(11-12):1353-1364. Accessed Nov 1, 2017.
160. Joliat MJ, Lang PA, Lyons BL, et al. Absence of CD5 dramatically reduces progression of pulmonary inflammatory lesions in SHP-1 protein-tyrosine phosphatase-deficient 'viable motheaten' mice. *J Autoimmun.* 2002;18(2):105-117. Accessed Nov 23, 2017. doi: 10.1006/jaut.2001.0570.
161. Abram CL, Roberge GL, Pao LI, Neel BG, Lowell CA. Distinct roles for neutrophils and dendritic cells in inflammation and autoimmunity in motheaten mice. *Immunity.* 2013;38(3):489-501. <http://www.ncbi.nlm.nih.gov/pubmed/23521885>. doi: 10.1016/j.immuni.2013.02.018.
162. Yu CC, Tsui HW, Ngan BY, Shulman MJ, Wu GE, Tsui FW. B and T cells are not required for the viable motheaten phenotype. *J Exp Med.* 1996;183(2):371-380. Accessed Nov 24, 2017.
163. Dubois M, Bergeron S, Kim H, et al. The SHP-1 protein tyrosine phosphatase negatively modulates glucose homeostasis. *Nat Med.* 2006;12(5):549-556. Accessed Nov 23, 2017. doi: 10.1038/nm1397.
164. Umeda S, Beamer WG, Takagi K, et al. Deficiency of SHP-1 protein-tyrosine phosphatase activity results in heightened osteoclast function and decreased bone density. *Am J Pathol.* 1999;155(1):223-233. Accessed Nov 24, 2017.
165. Tsui HW, Siminovich KA, de Souza L, Tsui FW. Motheaten and viable motheaten mice have mutations in the haematopoietic cell phosphatase gene. *Nat Genet.* 1993;4(2):124-129. Accessed Nov 23, 2017. doi: 10.1038/ng0693-124.
166. Gomi H, Mori K, Itoharu S, Izumi T. Rab27b is expressed in a wide range of exocytic cells and involved in the delivery of secretory granules near the plasma membrane. *Mol Biol Cell.* 2007;18(11):4377-4386. Accessed Feb 1, 2018. doi: 10.1091/mbc.E07-05-0409.
167. Kim JD, Willetts L, Ochkur S, et al. An essential role for Rab27a GTPase in eosinophil exocytosis. *J Leukoc Biol.* 2013;94(6):1265-1274. Accessed Feb 1, 2018. doi: 10.1189/jlb.0812431.
168. Haddad EK, Wu X, Hammer JA, Henkart PA. Defective granule exocytosis in Rab27a-deficient lymphocytes from ashen mice. *J Cell Biol.* 2001;152(4):835-842. Accessed Feb 1, 2018.
169. Pachlopnik Schmid J, Ho C, Diana J, et al. A griscelli syndrome type 2 murine model of hemophagocytic lymphohistiocytosis (HLH). *Eur J Immunol.* 2008;38(11):3219-3225. Accessed Feb 1, 2018. doi: 10.1002/eji.200838488.
170. Stinchcombe JC, Barral DC, Mules EH, et al. Rab27a is required for regulated secretion in cytotoxic T lymphocytes. *J Cell Biol.* 2001;152(4):825-834. Accessed Jan 31, 2018.
171. Futter CE, Ramalho JS, Jaissle GB, Seeliger MW, Seabra MC. The role of Rab27a in the regulation of melanosome distribution within retinal pigment epithelial cells. *Mol Biol Cell.* 2004;15(5):2264-2275. Accessed Feb 1, 2018. doi: 10.1091/mbc.E03-10-0772.
172. Hou Y, Ernst SA, Stuenkel EL, Lentz SI, Williams JA. Rab27A is present in mouse pancreatic acinar cells and is required for digestive enzyme secretion. *PLoS ONE.* 2015;10(5):e0125596. Accessed Feb 1, 2018. doi: 10.1371/journal.pone.0125596.
173. Tolmachova T, Abrink M, Futter CE, Authi KS, Seabra MC. Rab27b regulates number and secretion of platelet dense granules. *Proc Natl Acad Sci U S A.* 2007;104(14):5872-5877. Accessed Feb 1, 2018. doi: 10.1073/pnas.0609879104.
174. Kasai K, Ohara-Imaizumi M, Takahashi N, et al. Rab27a mediates the tight docking of insulin granules onto the plasma membrane during glucose stimulation. *J Clin Invest.* 2005;115(2):388-396. Accessed Feb 1, 2018. doi: 10.1172/JCI22955.
175. Potter CS, Wang Z, Silva KA, et al. Chronic proliferative dermatitis in sharpin null mice: Development of an autoinflammatory disease in the absence of B and T lymphocytes and IL4/IL13 signaling. *PLoS ONE.* 2014;9(1):e85666. Accessed Dec 12, 2017. doi: 10.1371/journal.pone.0085666.

176. Seymour RE, Hasham MG, Cox GA, et al. Spontaneous mutations in the mouse sharpin gene result in multiorgan inflammation, immune system dysregulation and dermatitis. *Genes Immun.* 2007;8(5):416-421. Accessed Dec 12, 2017. doi: 10.1038/sj.gene.6364403.
177. Denis M, Forget A, Pelletier M, Skamene E. Pleiotropic effects of the *bcg* gene. I. antigen presentation in genetically susceptible and resistant congenic mouse strains. *J Immunol.* 1988;140(7):2395-2400. Accessed Apr 12, 2018.
178. Hedges JF, Kimmel E, Snyder DT, Jerome M, Jutila MA. Solute carrier 11A1 is expressed by innate lymphocytes and augments their activation. *J Immunol.* 2013;190(8):4263-4273. Accessed Oct 24, 2017. doi: 10.4049/jimmunol.1200732.
179. Bauler TJ, Starr T, Nagy TA, et al. Salmonella meningitis associated with monocyte infiltration in mice. *Am J Pathol.* 2017;187(1):187-199. Accessed Nov 16, 2017. doi: 10.1016/j.ajpath.2016.09.002.
180. Valdez Y, Diehl GE, Vallance BA, et al. Nramp1 expression by dendritic cells modulates inflammatory responses during salmonella typhimurium infection. *Cellular Microbiology.* 2008;10(8):1646-1661. <http://www.ingentaconnect.com/content/bsc/cmi/2008/0000010/00000008/art00008>. doi: 10.1111/j.1462-5822.2008.01155.x.
181. Blin-Wakkach C, Wakkach A, Quincey D, Carle GF. Interleukin-7 partially rescues B-lymphopoiesis in osteopetrotic oc/oc mice through the engagement of B220+ CD11b+ progenitors. *Exp Hematol.* 2006;34(7):851-859. Accessed Apr 12, 2018. doi: 10.1016/j.exphem.2006.04.003.
182. Blin-Wakkach C, Wakkach A, Sexton PM, Rochet N, Carle GF. Hematological defects in the oc/oc mouse, a model of infantile malignant osteopetrosis. *Leukemia.* 2004;18(9):1505-1511. Accessed Dec 3, 2017. doi: 10.1038/sj.leu.2403449.
183. Koehne T, Marshall RP, Jeschke A, Kahl-Nieke B, Schinke T, Amling M. Osteopetrosis, osteopetrorickets and hypophosphatemic rickets differentially affect dentin and enamel mineralization. *Bone.* 2013;53(1):25-33. Accessed Dec 3, 2017. doi: 10.1016/j.bone.2012.11.009.
184. Schinke T, Schilling AF, Baranowsky A, et al. Impaired gastric acidification negatively affects calcium homeostasis and bone mass. *Nat Med.* 2009;15(6):674-681. Accessed Apr 12, 2018. doi: 10.1038/nm.1963.
185. Dabbagh K, Dahl ME, Stepick-Biek P, Lewis DB. Toll-like receptor 4 is required for optimal development of Th2 immune responses: Role of dendritic cells. *J Immunol.* 2002;168(9):4524-4530. Accessed Nov 20, 2017.
186. Netea MG, Van der Meer, Jos W M, Suttmuller RP, Adema GJ, Kullberg B. From the Th1/Th2 paradigm towards a toll-like receptor/T-helper bias. *Antimicrob Agents Chemother.* 2005;49(10):3991-3996. Accessed Nov 20, 2017. doi: 10.1128/AAC.49.10.3991-3996.2005.
187. Ohashi K, Burkart V, Flohé S, Kolb H. Cutting edge: Heat shock protein 60 is a putative endogenous ligand of the toll-like receptor-4 complex. *J Immunol.* 2000;164(2):558-561. Accessed Nov 20, 2017.
188. Standiford LR, Standiford TJ, Newstead MJ, et al. TLR4-dependent GM-CSF protects against lung injury in gram-negative bacterial pneumonia. *Am J Physiol Lung Cell Mol Physiol.* 2012;302(5):447. Accessed Nov 20, 2017. doi: 10.1152/ajplung.00415.2010.
189. Vaure C, Liu Y. A comparative review of toll-like receptor 4 expression and functionality in different animal species. *Frontiers in immunology.* 2014;5:316. <http://www.ncbi.nlm.nih.gov/pubmed/25071777>. doi: 10.3389/fimmu.2014.00316.
190. Poltorak A, He X, Smirnova I, et al. Defective LPS signaling in C3H/HeJ and C57BL/10ScCr mice: Mutations in *Tlr4* gene. *Science.* 1998;282(5396):2085-2088. Accessed Dec 29, 2017.
191. Qureshi ST, Larivière L, Leveque G, et al. Endotoxin-tolerant mice have mutations in toll-like receptor 4 (*Tlr4*). *J Exp Med.* 1999;189(4):615-625. Accessed Dec 29, 2017.
192. Chung YW, Choi JH, Oh T-, Eun CS, Han DS. Lactobacillus casei prevents the development of dextran sulphate sodium-induced colitis in toll-like receptor 4 mutant mice. *Clin Exp Immunol.* 2008;151(1):182-189. Accessed Nov 20, 2017. doi: 10.1111/j.1365-2249.2007.03549.x.
193. Loser K, Vogl T, Voskort M, et al. The toll-like receptor 4 ligands Mrp8 and Mrp14 are crucial in the development of autoreactive CD8+ T cells. *Nat Med.* 2010;16(6):713-717. Accessed Nov 20, 2017. doi: 10.1038/nm.2150.
194. Pierer M, Wagner U, Rossol M, Ibrahim S. Toll-like receptor 4 is involved in inflammatory and joint destructive pathways in collagen-induced arthritis in DBA1J mice. *PLoS ONE.* 2011;6(8):e23539. Accessed Nov 20, 2017. doi: 10.1371/journal.pone.0023539.
195. Reynolds JM, Martinez GJ, Chung Y, Dong C. Toll-like receptor 4 signaling in T cells promotes autoimmune inflammation. *Proc Natl Acad Sci U S A.* 2012;109(32):13064-13069. Accessed Nov 20, 2017. doi: 10.1073/pnas.1120585109.



196. Liu Y, Yin H, Zhao M, Lu Q. TLR2 and TLR4 in autoimmune diseases: A comprehensive review. *Clin Rev Allergy Immunol*. 2014;47(2):136-147. Accessed Nov 22, 2017. doi: 10.1007/s12016-013-8402-y.
197. Cao C, Yang Q, Lv F, Cui J, Fu H, Wang J. Reduced cerebral ischemia-reperfusion injury in toll-like receptor 4 deficient mice. *Biochem Biophys Res Commun*. 2007;353(2):509-514. Accessed Nov 20, 2017. doi: 10.1016/j.bbrc.2006.12.057.
198. Holland WL, Bikman BT, Wang L, et al. Lipid-induced insulin resistance mediated by the proinflammatory receptor TLR4 requires saturated fatty acid-induced ceramide biosynthesis in mice. *J Clin Invest*. 2011;121(5):1858-1870. Accessed Nov 20, 2017. doi: 10.1172/JCI43378.
199. Kilic U, Kilic E, Matter CM, Bassetti CL, Hermann DM. TLR-4 deficiency protects against focal cerebral ischemia and axotomy-induced neurodegeneration. *Neurobiol Dis*. 2008;31(1):33-40. Accessed Nov 20, 2017. doi: 10.1016/j.nbd.2008.03.002.
200. Mollen KP, Levy RM, Prince JM, et al. Systemic inflammation and end organ damage following trauma involves functional TLR4 signaling in both bone marrow-derived cells and parenchymal cells. *J Leukoc Biol*. 2008;83(1):80-88. Accessed Nov 20, 2017. doi: 10.1189/jlb.0407201.
201. Souza ACP, Tsuji T, Baranova IN, et al. TLR4 mutant mice are protected from renal fibrosis and chronic kidney disease progression. *Physiol Rep*. 2015;3(9). Accessed Nov 20, 2017. doi: 10.14814/phy2.12558.
202. Timmers L, Sluijter JPG, van Keulen JK, et al. Toll-like receptor 4 mediates maladaptive left ventricular remodeling and impairs cardiac function after myocardial infarction. *Circ Res*. 2008;102(2):257-264. Accessed Nov 20, 2017. doi: 10.1161/CIRCRESAHA.107.158220.
203. Wright SD, Burton C, Hernandez M, et al. Infectious agents are not necessary for murine atherogenesis. *J Exp Med*. 2000;191(8):1437-1442. Accessed Nov 20, 2017.
204. Zanotti G, Casiraghi M, Abano JB, et al. Novel critical role of toll-like receptor 4 in lung ischemia-reperfusion injury and edema. *Am J Physiol Lung Cell Mol Physiol*. 2009;297(1):52. Accessed Nov 20, 2017. doi: 10.1152/ajplung.90406.2008.
205. Zhai Y, Ao L, Cleveland JC, et al. Toll-like receptor 4 mediates the inflammatory responses and matrix protein remodeling in remote non-ischemic myocardium in a mouse model of myocardial ischemia and reperfusion. *PLoS ONE*. 2015;10(3):e0121853. Accessed Nov 20, 2017. doi: 10.1371/journal.pone.0121853.
206. Chen L, Guo S, Ranzer MJ, DiPietro LA. Toll-like receptor 4 has an essential role in early skin wound healing. *J Invest Dermatol*. 2013;133(1):258-267. Accessed Nov 20, 2017. doi: 10.1038/jid.2012.267.
207. Yusuf N, Nasti TH, Long JA, et al. Protective role of toll-like receptor 4 during the initiation stage of cutaneous chemical carcinogenesis. *Cancer Res*. 2008;68(2):615-622. Accessed Nov 20, 2017. doi: 10.1158/0008-5472.CAN-07-5219.
208. Derek Lacey, Peter Hickey, Benedicta D. Arhatari, et al. Spontaneous retrotransposon insertion into TNF 3'UTR causes heart valve disease and chronic polyarthritis. *Proceedings of the National Academy of Sciences*. 2015;112(31):9698. <http://www.pnas.org/content/112/31/9698.abstract>. doi: 10.1073/pnas.1508399112.
209. Gershwin ME, Ahmed A, Ikeda RM, Shifrine M, Wilson F. Immunobiology of congenitally athymic-asplenic mice. *Immunology*. 1978;34(4):631-642. Accessed Oct 30, 2017.
210. Green MC. A defect of the splanchnic mesoderm caused by the mutant gene dominant hemimelia in the mouse. *Dev Biol*. 1967;15(1):62-89. Accessed Oct 30, 2017.
211. Hecksher-Sørensen J, Watson RP, Lettice LA, et al. The splanchnic mesodermal plate directs spleen and pancreatic laterality, and is regulated by Bapx1/Nkx3.2. *Development*. 2004;131(19):4665-4675. Accessed Oct 30, 2017. doi: 10.1242/dev.01364.
212. Fairhurst A, Hwang S, Wang A, et al. Yaa autoimmune phenotypes are conferred by overexpression of TLR7. *European journal of immunology*. 2008;38(7):1971. <http://www.ncbi.nlm.nih.gov/pubmed/18521959>.
213. Izui S, Ibnou-Zekri N, Fossati-Jimack L, Iwamoto M. Lessons from BXSb and related mouse models. *Int Rev Immunol*. 2000;19(4-5):447-472. Accessed Nov 28, 2017.
214. Jason A. Bubier, Thomas J. Sproule, Oded Foreman, et al. A critical role for IL-21 receptor signaling in the pathogenesis of systemic lupus erythematosus in BXSb-yaa mice. *Proceedings of the National Academy of Sciences of the United States of America*. 2009;106(5):1518-1523. <http://www.jstor.org/stable/40272410>. doi: 10.1073/pnas.0807309106.

215. Kim H, Wang X, Radfar S, Sproule TJ, Roopenian DC, Cantor H. [CD8<sup>sup.+</sup>] T regulatory cells express the Ly49 class I MHC receptor and are defective in autoimmune prone B6-*yaa* mice. *Proceedings of the National Academy of Sciences of the United States*. 2011;108(5):2010. <https://www.ncbi.nlm.nih.gov/pmc/articles/PMC3033298/>. doi: 10.1073/pnas.1018974108.
216. Kimura J, Ichii O, Nakamura T, Horino T, Otsuka S, Kon Y. BXS<sup>B</sup>-type genome causes murine autoimmune glomerulonephritis: Pathological correlation between telomeric region of chromosome 1 and *yaa*. *Genes Immun*. 2014;15(3):182-189. Accessed Nov 30, 2017. doi: 10.1038/gene.2014.4.
217. McPhee C. *Pathogenesis of the systemic lupus erythematosus-like disease of the BXS<sup>B</sup>.yaa mouse*. ProQuest Dissertations Publishing; 2011.
218. Srividya Subramanian, Katalin Tus, Quan-Zhen Li, et al. A Tlr7 translocation accelerates systemic autoimmunity in murine lupus. *Proceedings of the National Academy of Sciences of the United States of America*. 2006;103(26):9970-9975. <http://www.jstor.org/stable/30051025>. doi: 10.1073/pnas.0603912103.
219. Wiest DL, Ashe JM, Howcroft TK, et al. A spontaneously arising mutation in the DLAARN motif of murine ZAP-70 abrogates kinase activity and arrests thymocyte development. *Immunity*. 1997;6(6):663-671. Accessed Dec 10, 2017.
220. Guerard S, Holmdahl R, Wing K. Reactive oxygen species regulate innate but not adaptive inflammation in ZAP70-mutated SKG arthritic mice. *Am J Pathol*. 2016;186(9):2353-2363. Accessed Dec 11, 2017. doi: 10.1016/j.ajpath.2016.05.014.
221. Hata H, Sakaguchi N, Yoshitomi H, et al. Distinct contribution of IL-6, TNF- $\alpha$ , IL-1, and IL-10 to T cell-mediated spontaneous autoimmune arthritis in mice. *Journal of Clinical Investigation*. 2004;114(4):582-588. <http://www.pubmedcentral.nih.gov/articlerender.fcgi?artid=503774&tool=pmcentrez&rendertype=abstract>. doi: 10.1172/JCI200421795.
222. Sakaguchi N, Takahashi T, Hata H, et al. Altered thymic T-cell selection due to a mutation of the ZAP-70 gene causes autoimmune arthritis in mice. *Nature*. 2003;426(6965):454-460. Accessed Dec 11, 2017. doi: 10.1038/nature02119.
