# Supplementary material
Source: PubMed Central journal article supplement (PMC7114723)
Supplement: ily026_suppl_table-1_er_06-05-2019.pdf [file ily026_suppl_table-1_er_06-05-2019.pdf]

**Supplementary Table 1:** selected examples of immunological variation among common inbred strains of laboratory mice.

| Gene                                                                   | Function                                                                                                                                    | Strain with deficits or polymorphisms                                                | Normal expression                                                                           | Strain-related References |
|------------------------------------------------------------------------|---------------------------------------------------------------------------------------------------------------------------------------------|--------------------------------------------------------------------------------------|---------------------------------------------------------------------------------------------|---------------------------|
| Aryl hydrocarbon receptor ( <i>Ahr</i> )                               | Activation of <i>Cyp450</i> expression, decreased IL22, increased IL17                                                                      | <i>Ahr<sup>Δt</sup></i><br>129/J, AKR, DBA/2J, NZB, SJL/J, SWR                       | <i>Ahr<sup>b-1</sup> Ahr<sup>b-2</sup></i><br>A/J, BALB/c, C57BL/6J, CBA/J, C3H/HeJ, DBA/1J | 1-4                       |
| Cathepsin E ( <i>Ctse</i> )                                            | Chemotaxis, cell adhesion, antigen processing for MHC class II presentation                                                                 | C57BL/6JOlaHsd, C57BL/6                                                              | BALB/c, 129S2/SvHsd, CBA/J                                                                  | 5                         |
| Dedicator of cytokinesis 2 ( <i>Dock2</i> )                            | Chemotaxis, lymphocyte migration, B cell development, plasmacytoid DCs function                                                             | C57BL/6NHsd (from specific breeding facilities)                                      | All other C57BL/6 substrains                                                                | 6,7                       |
| Complement factor C5 ( <i>Hc</i> )                                     | Complement system, innate immunity, C5a anaphylatoxin with spasmogenic and chemotactic activity, C5b subunit of the membrane attack complex | A/J, AKR/J, DBA/2, FVB/NJ, NOD/ShiLtJ, SWR                                           | C57BL/6, 129 strains, DBA/1, MRL/MpJ, NZB, NZW                                              | 8,9                       |
| Fc receptor, IgE, low affinity II, alpha polypeptide ( <i>Fcer2a</i> ) | CD23, low-affinity receptor for IgE, negative regulation of IgE response                                                                    | <i>Fcer2a<sup>Hie</sup></i> (reduced level of expression)<br>NZB, 129P1/ReJ, 129/SvJ | BALB/c, C57BL/6                                                                             | 10,11                     |
| Interleukin 2 ( <i>Il2</i> )                                           | Clonal expansion of B and T cells, immune cell development and activation, immune tolerance, adaptive cell-mediated immunity                | <i>Il2<sup>mi</sup></i> (hypoactive)<br>MRL/MpJ, NOD/ShiLtJ, SJL/J                   | C57BL/6                                                                                     | 12                        |
| Interleukin 12b ( <i>Il12b</i> )                                       | Development and activation of T cells and NK cell, promotion of TH1-type immune response                                                    | Polymorphism enhances activity<br>SJL/J                                              | C57BL/6, C57BL/10ScCr                                                                       | 13-15                     |
| MX dynamin-like GTPase 1 and 2 ( <i>Mx1 and Mx2</i> )                  | Innate immunity, IFN $\alpha$ and IFN $\beta$ -mediated response to viral infection                                                         | Most inbred strains                                                                  | Most of the wild mice or wild-derived strains                                               | 16,17                     |
| Neuronal apoptosis inhibitor protein ( <i>Naip5</i> )                  | Recognition of flagellin, activation of the inflammasome, macrophage pyroptosis                                                             | A/J                                                                                  | Most inbred strains                                                                         | 18,19                     |
| 2'-5' oligoadenylate synthetase 1B ( <i>Oas1b</i> )                    | Activation of RNA nucleases, innate immunity, protection against flaviviruses                                                               | Most inbred strains                                                                  | Most of wild mice or wild-derived strains                                                   | 20                        |

| Gene                                                     | Function                                                                                                                                              | Strain with deficits or polymorphisms                                                   | Normal expression                                                                                                     | Strain-related References |
|----------------------------------------------------------|-------------------------------------------------------------------------------------------------------------------------------------------------------|-----------------------------------------------------------------------------------------|-----------------------------------------------------------------------------------------------------------------------|---------------------------|
| NLR family, pyrin domain containing 1B ( <i>Nlrp1b</i> ) | Innate immunity, inflammasome, response to PAMPs and DAMPs, susceptibility/resistance to <i>Bacillus anthracis</i> infection and anthrax LT challenge | <i>Nlrp1b<sup>s</sup></i><br>BALB/cJ, CBA/J, C3H/HeJ, FVB/NJ                            | <i>Nlrp1b<sup>r</sup></i><br>C57BL/6J, NOD/LtJ, AKR/J, A/J, DBA/2J                                                    | 21                        |
| Signal regulatory protein alpha ( <i>Sirpa</i> )         | T cell immune regulation, "don't eat me" signal                                                                                                       | Decreased function polymorphism<br>BALB/c, NOD/ShiLtJ                                   | Most other strains                                                                                                    | 22                        |
| Signaling lymphocyte activation molecule (SLAM) family   | Innate and adaptive immunity, self tolerance                                                                                                          | <i>Haplotype 2</i><br>NOD, MRL/MpJ, NZB, NZW, DBA/2J, 129/SvJ, BALB/cJ, C3H/HeJ, others | <i>Haplotype 1</i><br>C57BL/6, C3H/HeN                                                                                | 23-25                     |
| Solute carrier family-1 1a member 1 ( <i>Slc11a1</i> )   | Macrophage activation and iron metabolism in macrophages                                                                                              | <i>Slc11a1<sup>s</sup></i><br>BALB/c, C57BL/6J, C57BL/10J, DBA/1J, NZW                  | <i>Slc11a1<sup>r</sup></i><br>129 strains, A/J, AKR/J, CBA/C3H/HeJ, C3H/HeN, DBA/2J, NZB                              | 26                        |
| T cell receptor beta variable 8 ( <i>Tcrb-V8</i> )       | NKT and CD8+NKT, glycolipids in context of CD1d                                                                                                       | SJL/J, FVB/NJ, SWR, C57L, C57BR                                                         | C57BL/6, 129, BALB/c                                                                                                  | 27-29                     |
| Toll-like receptor 4 ( <i>Tlr4</i> )                     | Microbial PAMPs (LPS), endogenous DAMPs                                                                                                               | <i>Tlr4<sup>Lps-d</sup></i> , <i>Tlr4<sup>Lps-del</sup></i><br>C3H/HeJ, C57BL/10ScN     | <i>Tlr4<sup>Lps-n</sup></i><br>129 strains, C3H/HeN, C3H/HeOuJ, C57BL/6, DBA/2J, FVB, NOD/ShiLtJ, NZB, NZW, SJ/J, SWR | 30,31                     |

Abbreviations and acronyms used in the table:

Cyp450: cytochrome p450, DAMPs: damage-associated molecular pattern molecules, DC: dendritic cell, IFN: interferon, IL: interleukin, MHC: major histocompatibility complex, NK: natural killer, NKT: natural killer T, PAMPs: pathogen-associated molecular pattern molecules, LPS: lipopolysaccharide, LT: lethal toxin.

## References

1. Poland A, Glover E. Characterization and strain distribution pattern of the murine ah receptor specified by the ahd and ahb-3 alleles. *Mol Pharmacol*. 1990;38(0026-895; 3):306-312.
2. De Souza VR, Cabrera WK, Galvan A, et al. Aryl hydrocarbon receptor polymorphism modulates DMBA-induced inflammation and carcinogenesis in phenotypically selected mice. *Int J Cancer*. 2009;124(6):1478-1482.
3. Esser C, Rannug A, Stockinger B. The aryl hydrocarbon receptor in immunity. *Trends Immunol*. 2009;30(9):447-454.
4. Esser C. The immune phenotype of AhR null mouse mutants: Not a simple mirror of xenobiotic receptor over-activation. *Biochem Pharmacol*. 2009;77:597-607. <http://www.sciencedirect.com/science/article/pii/S0006295208007193>.
5. Tulone C, Tsang J, Prokopowicz Z, Grosvenor N, Chain B. Natural cathepsin E deficiency in the immune system of C57BL/6J mice. . 2007;59(12):927-935.
6. Mahajan VS, Demissie E, Mattoo H, et al. Striking immune phenotypes in gene-targeted mice are driven by a copy-number variant originating from a commercially available C57BL/6 strain. *Cell Rep*. 2016;15(9):1901-1909. Accessed Dec 13, 2017. doi: 10.1016/j.celrep.2016.04.080.
7. Purtha WE, Swiecki M, Colonna M, Diamond MS, Bhattacharya D. Spontaneous mutation of the Dock2 gene in Irf5<sup>-/-</sup> mice complicates interpretation of type I interferon production and antibody responses. *Proc Natl Acad Sci U S A*. 2012;109(15):898. Accessed Dec 13, 2017. doi: 10.1073/pnas.1118155109.
8. Wetsel RA, Fleischer DT, Haviland DL. Deficiency of the murine fifth complement component (C5). A 2-base pair gene deletion in a 5'-exon. *J Biol Chem*. 1990;265(5):2435-2440.
9. Skerka C, Chen Q, Fremeaux-Bacchi V, Roumenina LT. Complement factor H related proteins (CFHRs). *Mol Immunol*. 2013;56:170-180. <http://www.sciencedirect.com/science/article/pii/S0161589013004185>.
10. Ford JW, Sturgill JL, Conrad DH. 129/SvJ mice have mutated CD23 and hyper IgE. *Cell Immunol*. 2009;254(2):124-134. Accessed Mar 19, 2018. doi: 10.1016/j.cellimm.2008.08.003.
11. Lewis G, Rapsomaniki E, Bouriez T, et al. Hyper IgE in new zealand black mice due to a dominant-negative CD23 mutation. *Immunogenetics*. 2004;56(8):564-571. Accessed Mar 19, 2018. doi: 10.1007/s00251-004-0728-4.

12. Encinas JA, Wicker LS, Peterson LB, et al. QTL influencing autoimmune diabetes and encephalomyelitis map to a 0.15-cM region containing Il2. *Nat Genet.* 1999;21(2):158-160.
13. Javan MR, Shahraki S, Safa A, Zamani MR, Salmaninejad A, Aslani S. An interleukin 12 B single nucleotide polymorphism increases IL-12p40 production and is associated with increased disease susceptibility in patients with relapsing-remitting multiple sclerosis. *Neurol Res.* 2017;39(5):435-441.
14. Wen X, Chen S, Li P, et al. Single nucleotide polymorphisms of IL12B are associated with takayasu arteritis in chinese han population. *Rheumatol Int.* 2017;37(4):547-555.
15. Zwiers A, Fuss IJ, Seegers D, et al. A polymorphism in the coding region of Il12b promotes IL-12p70 and IL-23 heterodimer formation. *J Immunol.* 2011;2011/02/16:3572-3580.
16. Staeheli P, Grob R, Meier E, Sutcliffe JG, Haller O. Influenza virus-susceptible mice carry mx genes with a large deletion or a nonsense mutation. *Mol Cell Biol.* 1988;8:4518-4523. <http://mcb.asm.org/content/8/10/4518.abstract>.
17. Verhelst J, Spitaels J, Nurnberger C, et al. Functional comparison of Mx1 from two different mouse species reveals the involvement of loop L4 in the antiviral activity against influenza A viruses. *J Virol.* 2015;89(0022-538; 21):10879-10890.
18. Lightfield KL, Persson J, Brubaker SW, et al. Critical function for Naip5 in inflammasome activation by a conserved carboxy-terminal domain of flagellin. *Nat Immunol.* 2008;9(10):1171-1178.
19. Tenthorey JL, Haloupek N, Lopez-Blanco JR, et al. The structural basis of flagellin detection by NAIP5: A strategy to limit pathogen immune evasion. *Science.* 2017;358(6365):888-893.
20. Courtney SC, Di H, Stockman BM, Liu H, Scherbik SV, Brinton MA. Identification of novel host cell binding partners of Oas1b, the protein conferring resistance to flavivirus-induced disease in mice. *J Virol.* 2012;86(0022-538; 15):7953-7963.
21. Moayeri M, Crown D, Newman ZL, et al. Inflammasome sensor Nlrp1b-dependent resistance to anthrax is mediated by caspase-1, IL-1 signaling and neutrophil recruitment. *PLoS Pathogens.* 2010;6(2):e1001222. <http://www.ncbi.nlm.nih.gov/pubmed/21170303>. doi: 10.1371/journal.ppat.1001222.
22. Kwong LS, Brown MH, Barclay AN, Hatherley D. Signal-regulatory protein alpha from the NOD mouse binds human CD47 with an exceptionally high affinity-- implications for engraftment of human cells. *Immunology.* 2014;143(1):61-67.

23. Keszei M, Latchman YE, Vanguri VK, et al. Auto-antibody production and glomerulonephritis in congenic Slamf1<sup>-/-</sup> and Slamf2<sup>-/-</sup> B6.129] but not in Slamf1<sup>-/-</sup> and Slamf2<sup>-/-</sup> BALB/c.129] mice. *Int Immunol*. 2011;23(2):149-158.
24. Koh AE, Njoroge SW, Feliu M, et al. The SLAM family member CD48 (Slamf2) protects lupus-prone mice from autoimmune nephritis. *J Autoimmun*. 2011;37:48-57. <http://www.ncbi.nlm.nih.gov/pubmed/21561736>.
25. Crampton SP, Morawski PA, Bolland S. Linking susceptibility genes and pathogenesis mechanisms using mouse models of systemic lupus erythematosus. *Disease Models & Mechanisms*. 2014;7:1033-1046.  
<http://www.ncbi.nlm.nih.gov/pmc/articles/PMC4142724/>.
26. Stober CB, Brode S, White JK, Popoff JF, Blackwell JM. Slc11a1, formerly Nramp1, is expressed in dendritic cells and influences major histocompatibility complex class II expression and antigen-presenting cell function. *Infect Immun*. 2007;75(10):5059-5067.
27. Osman GE, Hannibal MC, Anderson JP, Lasky SR, Ladiges WC, Hood L. FVB/N (H2(q)) mouse is resistant to arthritis induction and exhibits a genomic deletion of T-cell receptor V beta gene segments. . 1999;49(10):851-859.
28. Osman GE, Hannibal MC, Anderson JP, et al. T-cell receptor vbeta deletion and valpha polymorphism are responsible for the resistance of SWR mouse to arthritis induction. . 1999;49(9):764-772.
29. Behlke MA, Chou HS, Huppi K, Loh DY. Murine T-cell receptor mutants with deletions of beta-chain variable region genes. *Proc Natl Acad Sci U S A*. 1986;83(3):767-771.
30. Poltorak A, He X, Smirnova I, et al. Defective LPS signaling in C3H/HeJ and C57BL/10ScCr mice: Mutations in Tlr4 gene. *Science*. 1998;282(5396):2085-2088.
31. Poltorak A, Smirnova I, He X, et al. Genetic and physical mapping of the lps locus: Identification of the toll-4 receptor as a candidate gene in the critical region. *Blood Cells Mol Dis*. 1998;24(3):340-355.
